1 **IFN- $\gamma$  stimulated murine and human neurons mount anti-parasitic**  
2 **defenses against the intracellular parasite *Toxoplasma gondii***

3 Sambamurthy Chandrasekaran<sup>1</sup>, Joshua A. Kochanowsky<sup>2</sup>, Emily F. Merritt<sup>2</sup>, Anita A.  
4 Koshy\* <sup>1,2,3</sup>

5  
6 <sup>1</sup>BIO5 Institute, University of Arizona, Tucson, Arizona, 85719, United States of  
7 America.

8 <sup>2</sup>Department of Immunobiology, University of Arizona, Tucson, Arizona, 85719, United  
9 States of America.

10 <sup>3</sup>Department of Neurology, University of Arizona, Tucson, Arizona, 85719, United States  
11 of America.

12

13

14 Running title: Neurons can clear intracellular parasites

15

16

17

18

19

20

21 Correspondence: Anita A. Koshy, [akoshy@arizona.edu](mailto:akoshy@arizona.edu)

## 22 **Summary**

23 Dogma holds that *Toxoplasma gondii* persists in neurons because neurons cannot clear  
24 intracellular parasites, even with IFN- $\gamma$  stimulation. As several recent studies questioned  
25 this idea, we used primary murine neuronal cultures from wild-type and transgenic mice  
26 in combination with IFN- $\gamma$  stimulation and parental and transgenic parasites to reassess  
27 IFN- $\gamma$  dependent neuronal clearance of intracellular parasites. We found that neurons  
28 respond to IFN- $\gamma$  and that a subset of neurons clear intracellular parasites via immunity  
29 regulated GTPases. Whole neuron reconstructions from mice infected with parasites  
30 that trigger neuron GFP expression only after full invasion revealed that ~40% of these  
31 *T. gondii*-invaded neurons no longer harbor parasites. Finally, IFN- $\gamma$  stimulated human  
32 stem cell derived neurons showed a ~ 50% decrease in parasite infection rate when  
33 compared to unstimulated cultures. This work highlights the capability of human and  
34 murine neurons to mount cytokine-dependent anti-*T. gondii* defense mechanisms *in*  
35 *vitro* and *in vivo*.

36

37

38

39

40 **Keywords:** Murine neurons, human neurons, *T. gondii*, Immunity related GTPases,

41

42

43

## 44 **Introduction**

45 A select number of highly divergent intracellular microbes (e.g. measles virus, polio  
46 virus, *Toxoplasma gondii*) cause infections of the central nervous system (CNS).  
47 Though these microbes infect many cell types, in the CNS, neurons are often  
48 preferentially infected. One commonly cited reason for this neuron predominance is that  
49 neurons lack the ability to mount traditional cell-intrinsic immune responses (Joly et al.,  
50 1991; Oldstone et al., 1986; Rall et al., 1995). For example, neurons have low baseline  
51 levels of MHC I and STAT1 (Joly et al., 1991; Neumann et al., 1995; Rose et al., 2007;  
52 Wong et al., 1984). However, considerable evidence shows that neurons can respond  
53 to type I and type II interferons (Delhaye et al., 2006; Neumann et al., 1997, 1995; Rose  
54 et al., 2007) and clear certain viral pathogens (e.g. Sindbis virus (Binder and Griffin,  
55 2001; Orvedahl et al., 2010) and vesicular stomatitis virus (Detje et al., 2009)). Limited  
56 work has been done on the capabilities of neurons to clear non-viral pathogens.

57  
58 *Toxoplasma gondii* is a protozoan parasite that naturally infects most warm-blooded  
59 animals, including humans and mice. In most immune competent hosts, *T. gondii*  
60 establishes a persistent or latent infection by switching from its fast, growing lytic form  
61 (the tachyzoite) to its slow growing, encysting form (the bradyzoite). In humans and  
62 mice, the CNS is a major organ of persistence and neurons are the principal cell in  
63 which *T. gondii* cysts are found (D. J. Ferguson and Hutchison, 1987; D. J. P. Ferguson  
64 and Hutchison, 1987; Melzer et al., 2010; Cabral et al., 2016). IFN- $\gamma$  is essential for  
65 control of *T. gondii* both systemically and in the CNS (Suzuki et al., 1989, 1988), in part  
66 through the activation of the immunity regulated GTPase system (IRGs) which is critical

67 for parasite control in hematopoietic and non-hematopoietic cells (Collazo et al., 2002;  
68 Halonen et al., 2001; Taylor et al., 2000). Based upon these findings and *in vitro* studies  
69 showing that *T. gondii* readily invades murine astrocytes and neurons, but only IFN- $\gamma$ -  
70 stimulated astrocytes— not IFN- $\gamma$ -stimulated neurons— clear intracellular parasites  
71 (Jones et al., 1986; Halonen et al., 1998, 2001; Schluter et al., 2001), our model of CNS  
72 toxoplasmosis was that during natural infection parasites enter the CNS, invade both  
73 astrocytes and neurons, after which astrocytes kill the intracellular parasites, leaving the  
74 immunologically incompetent neuron as the host cell for the persistent, encysted form of  
75 the parasite.

76

77 Several recent findings have called this model into question. Pan-cellular ectopic  
78 expression of an MHC I allele (H-2 Ld) associated with low levels of CNS persistence  
79 (Blanchard et al., 2008; Brown et al., 1995) leads to a lower CNS parasite burden than  
80 when mice lack expression of this MHC I allele in neurons only (Salvioni et al., 2019).  
81 Moreover, the use of a Cre-based system that permanently marks CNS cells that have  
82 been injected with *T. gondii* proteins (Koshy et al., 2012, 2010), revealed that parasites  
83 extensively interact with neurons and that the majority (> 90%) of these *T. gondii*-  
84 injected neurons do not actively harbor cysts (Cabral et al., 2016; Koshy et al., 2012).  
85 Together these *in vivo* studies question our prior model by raising the possibility that  
86 neurons clear intracellular parasites.

87

88 Given these conflicting *in vitro* and *in vivo* findings, here we used primary murine  
89 neuronal cultures from wild-type and genetically modified mice in combination with

90 cytokine stimulation and parental and transgenic parasites, including a new engineered  
91 *T. gondii*-Cre line, to reassess the ability of neurons to clear intracellular parasites in the  
92 setting of IFN- $\gamma$  stimulation. These data reveal that neurons respond to IFN- $\gamma$ , including  
93 up-regulating the IRGs, and that a subset of neurons (~20%) clear intracellular parasites  
94 via the IRGs. In addition, in Cre reporter mice infected with *T. gondii*-Cre parasites that  
95 mark CNS cells only after fully invasion, whole neuron reconstructions showed that  
96 ~40% of these *T. gondii*-invaded neurons no longer harbor parasites. Finally, IFN- $\gamma$   
97 stimulation of human stem cell derived neurons (huSC-neurons) led to an ~50%  
98 decrease in parasite infection rate when compared to unstimulated, infected cultures.  
99 Collectively, these data highly suggest that IFN- $\gamma$  stimulation leads to parasite  
100 resistance in murine and human neurons and that a subset of murine neurons clear  
101 intracellular parasites both *in vitro* and *in vivo*, likely via the IRGs.

102

## 103 **Results**

### 104 **IFN- $\gamma$ stimulated primary pure murine cortical neurons show classical IFN- $\gamma$** 105 **responses.**

106 As *T. gondii* primarily infects and encysts in the cortex (Berenreiterová et al., 2011;  
107 Boillat et al., 2020; Mendez et al., 2021), we sought to determine the response of  
108 cortical neurons to IFN- $\gamma$  stimulation. To accomplish this goal, we exposed pure primary  
109 murine cortical neuronal cultures to 100 U/ml of IFN- $\gamma$  or vehicle control for 4 and 24hrs,  
110 followed by harvesting of total RNA. We chose these time points because prior work  
111 showed that hippocampal neurons have a delayed IFN- $\gamma$  response (Rose et al., 2007).  
112 After harvesting the RNA, we used quantitative real time-PCR (qRT-PCR) to quantify

113 the transcripts levels of traditional IFN- $\gamma$ -response genes (*STAT1*, *IRF1*, *MHC-I*) as well  
114 as the effector components of the IRG system (*Irga6*, *Irgb6*, and *Gbp2*) (Howard et al.,  
115 2011; Khaminets et al., 2010). We found that *STAT1*, the classical transcription factor  
116 that drives the expression of many IFN- $\gamma$  response genes, and *IRF1* were highly  
117 upregulated (4hrs:3-5 log<sub>2</sub> fold; 24hrs: 5-7 log<sub>2</sub> fold) compared to unstimulated neurons  
118 (**Fig 1A**), while MHC-I showed a more modest level of upregulation (~ 2 log<sub>2</sub> fold). In  
119 addition, consistent with finding in non-neuronal murine cells, compared to unstimulated  
120 neurons, IFN- $\gamma$  stimulated neurons also significantly up-regulated *Irga6*, *Irgb6*, and  
121 *Gbp2* (4hrs:4-7 log<sub>2</sub> folds; 24hrs: 7-9 log<sub>2</sub> folds) (**Fig 1A**) (Boehm et al., 1998; Degrandi  
122 et al., 2013; Lafuse et al., 1995). To determine how these increased transcript levels  
123 translated to protein levels, we isolated total protein lysates from unstimulated and IFN-  
124  $\gamma$  stimulated cultures. For *STAT1*, we blotted both for total *STAT1* and for  
125 phosphorylated *STAT1*, the active form that enters the nucleus and binds DNA.  
126 Compared to unstimulated cultures, IFN- $\gamma$  stimulation cultures showed a >10-fold  
127 increase in protein levels for total *STAT1* and p-*STAT1* at 24hrs post-stimulation and an  
128 >35-fold increase at 48hrs post-stimulation (**Fig 1B**). The undetectable level of total  
129 *STAT1* in unstimulated neurons is consistent with previously published data suggesting  
130 that cultured neurons have low or no constitutive amounts of *STAT1* (O'Donnell et al.,  
131 2015). Similarly, at 24 hours post-stimulation, the IRG complex effector proteins *Irga6*  
132 and *Irgb6* increased ~ 7-fold and 10-fold respectively over unstimulated cultures, a level  
133 that was maintained at 48 hours post stimulation.

134

135 To confirm that the detected changes were primarily driven by neurons and not by glial  
136 cells that commonly cause low levels of contamination in “pure” neuronal cultures, we  
137 stained the cultures to determine what percentage of cells were neurons, astrocytes, or  
138 microglia. These analyses showed that our cultures were consistently 95% neurons and  
139 5% astrocytes; no microglia were observed (**Fig S1**). To determine the level of nuclear  
140 translocation pSTAT1 at the single neuron level, we stained unstimulated and  
141 stimulated (100 U/ml for 24hrs) primary neuron cultures with DAPI and antibodies  
142 against Tuj1, a neuronal marker, and p-STAT1. We then quantified the pSTAT1 signal  
143 intensity in Tuj1<sup>+</sup> nuclei. In unstimulated cultures, we observed almost no pSTAT1  
144 signal in Tuj1<sup>+</sup> nuclei (MFI 2236 ± 353.24, mean ± SEM) (**Fig 1C, D**). Conversely, IFN-γ  
145 stimulated neurons showed robust pSTAT1 staining in Tuj1<sup>+</sup> nuclei (MFI 44778 ±  
146 25785, mean ± SEM) (**Fig 1C, D**).

147

148 Together these data show that IFN-γ stimulated primary murine cortical neuron cultures  
149 upregulate IFN-γ response genes and proteins in a delayed manner consistent with  
150 what has been observed in hippocampal neurons (Rose et al., 2007). The upregulated  
151 genes and proteins include *STAT1* and the IRG genes known to be required for IFN-γ-  
152 dependent killing of intracellular parasites in murine non-neuronal cells (Khaminets et  
153 al., 2010). Collectively, these data suggest that IFN-γ stimulated murine cortical neurons  
154 upregulate the appropriate machinery to clear intracellular parasites via the IRG system.

155

156 **IFN-γ pre-stimulation leads to a decrease in the percentage of *T. gondii*-infected**  
157 **neurons.**

158 To address neuronal capability for clearing intracellular parasites, we infected IFN- $\gamma$   
159 stimulated or unstimulated neurons with the two canonical parasite strains (type II and  
160 type III) that have moderate to mild acute virulence in mice because both are IRG-  
161 sensitive (Khaminets et al., 2010). We then monitored infection rates of neurons at 3,  
162 12, and 24 hours post infection (hpi). At 3hpi, stimulated and unstimulated neurons  
163 showed a similar rate of neuron infection, regardless of infecting strain (**Fig 2A, B**). By  
164 12 and 24 hpi, regardless of infecting strain, IFN- $\gamma$  stimulated cultures showed an ~25%  
165 decrease in neuron infection rate compared to unstimulated cultures (**Fig 2A, B**).

166

167 **GCre-expressing parasites show that neurons clear parasites in response to IFN-**  
168  **$\gamma$ .**

169 While the prior data suggested that IFN- $\gamma$  stimulated neurons might clear intracellular  
170 parasites, they could also be explained by decreased rates of late invasion in the IFN- $\gamma$   
171 stimulated neurons, especially as clearance assays in neurons are limited by the  
172 inability to synchronize infection or vigorously wash off uninvaded parasites as either  
173 procedure causes widespread neuronal death. To address the possibility of an invasion  
174 defect versus true clearance of intracellular parasites, we required a way to specifically  
175 track neurons that were infected and subsequently cleared the intracellular parasite. As  
176 noted above, we had previously developed a Cre-based system that leads to GFP  
177 expression only in host cells injected with *T. gondii* proteins. In this system, Cre is fused  
178 to a rhoptry protein (or ROP), which are parasite proteins that are injected into host cells  
179 prior to invasion, which means that parasite-triggered host cell expression does not  
180 require parasite invasion (i.e., aborted invasion) (**Fig 2C**). Thus, the RCre (ROP::Cre)-



181 expressing parasites do not help us distinguish between aborted invasion versus  
182 clearance of intracellular parasites. Therefore, we fused Cre to a dense granule protein  
183 (GRA) that is released into host cells only after invasion (Bougdour et al., 2013; Braun  
184 et al., 2013; Franco et al., 2016; Gay et al., 2016). Thus, GCre (GRA::Cre)-expressing  
185 parasites would not cause Cre-mediated recombination in the setting of aborted  
186 invasion (**Fig 2C**) and would identify only host cells that were or had previously been  
187 infected.

188

189 We engineered type II (Prugniaud) parasites to express an HA-tagged GCre (II-GCre).  
190 Using immunofluorescent assays and plaque assays, we determined that GCre was  
191 expressed, did not localize to the rhoptries, and that the expression of GCre did not  
192 affect overall parasite viability (**Fig S2**). To test the capability of II-GCre parasites to  
193 trigger Cre-mediated recombination, we infected fibroblast Cre reporter cells that  
194 express GFP only after Cre-mediated recombination (Koshy et al., 2010) with II-RCre  
195 parasites, II-GCre parasites, or parental type II parasites (no Cre expression). At 24  
196 hours post-infection, we observed that both II-RCre parasites and II-GCre parasites  
197 caused host cell expression of GFP, while the parental strain did not (**Fig. S3A**).  
198 Compared to II-RCre parasites, II-GCre parasites showed a decreased efficiency of  
199 causing Cre-mediated recombination (>90% vs. 50%, **Fig. S3B**), which was expected  
200 because host cell-exported GRA proteins show decreased exportation when fused to  
201 ordered proteins (Bracha et al., 2018; Curt-Varesano et al., 2016; Franco et al., 2016).

202

203 Having confirmed that II-GCre parasites trigger Cre-mediated recombination, we next  
204 assessed the capability of II-GCre parasites to identify only infected cells. To address  
205 this concern, at 24 hours post-infection, we quantified the number of GFP<sup>+</sup> Cre reporter  
206 fibroblasts that harbored parasites. With II-RCre parasites, ~ 30% of GFP<sup>+</sup> cells were  
207 actively infected, while with II-GCre parasites, ~ 60% percent of GFP<sup>+</sup> cells were  
208 infected (**Fig. S3B**). While the II-GCre parasites doubled the rate of infected GFP<sup>+</sup> cells,  
209 ~40% were uninfected. As this fibroblast Cre reporter cell line continues to divide after  
210 infection and Cre-mediated recombination (Koshy et al., 2012), we hypothesized that  
211 such division accounted for the uninfected GFP<sup>+</sup> cells in II-GCre infected cultures. To  
212 test this possibility, we used cortical neuron cultures as neurons do not divide. In neuron  
213 cultures from Cre reporter mice, infection with II-RCre parasites resulted in 67% ±  
214 1.82% of GFP<sup>+</sup> neurons being actively infected, while infection with II-GCre parasites  
215 resulted in 98% ± 0.62% of GFP<sup>+</sup> neurons being actively infected (**Fig 2 D, E**). Given  
216 that both RCre and GCre infected cultures showed a substantial increase in actively  
217 infected GFP<sup>+</sup> cells when using non-dividing cells, these data suggest that in the  
218 fibroblast Cre reporter cell line, post-Cre-mediated recombination cell division accounts  
219 for ~40% of the uninfected GFP<sup>+</sup> cells. For the II-RCre parasites, the remaining ~30% of  
220 uninfected GFP<sup>+</sup> cells (and the ~30% of uninfected GFP<sup>+</sup> neurons) likely arise from  
221 aborted invasion (**Fig 2C**). For II-GCre parasites, that ~100% of GFP<sup>+</sup> neurons were  
222 infected confirms that II-GCre parasites trigger Cre-mediated recombination only after  
223 fully invading the host cell.

224

225 We next tested how IFN- $\gamma$  pre-stimulation affected the rate of infected GFP<sup>+</sup> neurons by  
226 stimulating Cre reporter neuron cultures with vehicle alone or IFN- $\gamma$  (100 U/ml) for 24  
227 hours prior to infection with II-GCre parasites. Consistent with previous results (**Fig 2E**),  
228 in the vehicle treated cultures,  $97 \pm 1.4\%$  of GFP<sup>+</sup> neurons harbored a parasite (**Fig. 2F,**  
229 **G**). In the setting of pre-treatment with IFN- $\gamma$ , now only  $78 \pm 1.6\%$  GFP<sup>+</sup> neurons  
230 harbored parasites. The data suggest that the decrease in the rate of infection in IFN- $\gamma$   
231 stimulated neurons (**2A, B**) is primarily mediated by IFN- $\gamma$  stimulated neurons clearing  
232 intracellular parasites, rather than IFN- $\gamma$  stimulation leading to a decrease in parasite  
233 invasion.

234

### 235 **In IFN- $\gamma$ stimulated murine neurons Irga6 loads onto the PVM in a Irgm1/3-** 236 **dependent manner**

237 As IFN- $\gamma$  stimulated neurons up-regulate the IRG effectors (**Fig 1**) and a portion clear  
238 intracellular parasites (**Fig 2**), we next sought to determine if neurons use the IRG  
239 system to mediate IFN- $\gamma$ -dependent killing of *T. gondii*. As the loading of IRGs on *T.*  
240 *gondii* PVM is indispensable for parasite clearance in IFN- $\gamma$  stimulated non-neuronal  
241 cells (Y. O. Zhao et al., 2009) and as Irga6 is one of the effectors that loads onto the PV  
242 (Khaminets et al., 2010), we analyzed the percentage of PVs that were also Irga6<sup>+</sup> in  
243 unstimulated and IFN- $\gamma$  stimulated neurons infected with type III parasites. Consistent  
244 with findings in non-neuronal murine cells, we found that in unstimulated neurons, type  
245 III parasite PVs showed almost no Irga6 loading, while PVs in IFN- $\gamma$  stimulated neurons  
246 showed an 8-fold increase in Irga6 loading (**Fig 3A, B**). To further confirm these  
247 findings, we also used a type III “IRG-resistant” strain (Cabral et al., 2016). This strain is

248 engineered to express high levels of ROP18 (III+ROP18). ROP18 is a *T. gondii* kinase  
249 that phosphorylates Irga6 thereby preventing PV loading and effector oligomerization  
250 (Hermanns et al., 2016). The parental type III strain has minimal expression of ROP18  
251 because of an insertion in the promoter region of the *rop18* gene; it is this lack of  
252 ROP18 expression that renders the parental strain susceptible to the IRGs (Saeij et al.,  
253 2006; Taylor et al., 2006). In cultures infected with III+ROP18 parasites, as expected,  
254 we now found almost no Irga6<sup>+</sup> PVs even in the setting of IFN- $\gamma$  stimulation (**Fig 3C, D**).  
255 Finally, to confirm that IRG-loading followed the same principles in neurons as in non-  
256 neuronal cells, we used neurons that lacked the regulatory IRG components (Irgm1 and  
257 Irgm3) (Collazo et al., 2001). Irgm1 and Irgm3 tether the effector components (e.g.  
258 Irga6) to the appropriate organelle until triggered to release the effectors onto the PV  
259 (Hunn et al., 2008) and thus are required for PV loading of Irga6 (Henry et al., 2009). In  
260 Irgm1/3 KO neurons, we found an increase in Irga6 dispersion throughout the cytosol in  
261 the setting of IFN- $\gamma$  stimulation but no specific loading onto PVs regardless of IFN- $\gamma$   
262 stimulation or infecting strain (**Fig 3E-H**).

263

264 Together, these data show that neuronal Irga6 loads onto the parasitophorous  
265 vacuole/PVM of intracellular IRG-sensitive parasites in the setting of IFN- $\gamma$  pre-  
266 stimulation and when neurons have an intact IRG-system. These data strongly suggest  
267 that murine neurons use the IRG system for IFN- $\gamma$ -dependent clearance/killing of  
268 intracellular parasites.

269

270 **IFN- $\gamma$  stimulated murine neurons kill intracellular parasites using the IRG system.**

271 While the preceding data strongly suggests that murine neurons deploy the IRG-system  
272 to kill intracellular parasites in the setting of IFN- $\gamma$  stimulation, they do not show that the  
273 IRG-system is essential for neuronal killing. To directly test this possibility, we took  
274 several approaches. First, we tested the ability of IFN- $\gamma$  stimulated, wild type (WT)  
275 neurons to clear III+ROP18 parasites which show no Irga6<sup>+</sup> loading even in the setting  
276 of IFN-stimulation (**Fig 3D**). Indeed, in murine neuronal cultures infected with III+ROP18  
277 parasites, we found the same rate of infection over time, regardless of IFN- $\gamma$  stimulation  
278 state (**Fig 4A**). Second, we infected Irgm1/3 KO neuronal cultures with parental (type III,  
279 IRG-sensitive) or III+ROP18 parasites (IRG-resistant) and with or without IFN- $\gamma$  pre-  
280 stimulation. We again found the same rate of infection, regardless of what strain we  
281 utilized (IRG-sensitive or resistant) and IFN- $\gamma$  pre-stimulation state (**Fig 4B**). As a final  
282 method of confirming that the lack of IRGs specifically affected intracellular parasites,  
283 we bred the Irgm1/3 KO mice to the Cre reporter mice to yield mice homozygous for the  
284 Cre reporter construct and that lack both Irgm1 and Irgm3 (Fig S4) and generated  
285 neuronal cultures from these Cre reporter Irgm1/3 KO mice. We then stimulated these  
286 neuronal cultures with vehicle or IFN- $\gamma$ , followed by infection with II-GCre parasites. In  
287 these cultures, ~98% (-IFN- $\gamma$ : 98.12  $\pm$  0.67%; + IFN- $\gamma$ : 97.8%  $\pm$  0.53) of GFP<sup>+</sup> neurons  
288 were infected, regardless of IFN- $\gamma$  stimulation status (**Fig 4C, D**).

289

290 Collectively, these data definitively show that *in vitro* IFN- $\gamma$  stimulated neurons kill  
291 intracellular IRG-sensitive parasites via the IRG system.

292

293 **Neurons clear intracellular parasites *in vivo***

294 Having shown that IFN- $\gamma$  stimulated neurons clear intracellular parasites *in vitro*, we  
295 sought to determine if neurons cleared parasites *in vivo*. As the II-GCre parasites trigger  
296 Cre-mediated recombination only after full host cell invasion (**Fig 2C**), we reasoned that  
297 if we found GFP<sup>+</sup>, parasite<sup>-</sup> neurons in Cre reporter mice infected with II-GCre parasites,  
298 these neurons must have cleared the invading parasite. To assess for GFP<sup>+</sup> parasite-  
299 neurons *in vivo*, we created whole neuron reconstructions from 200  $\mu$ m cleared brain  
300 sections stained with Hoechst from 21-day post-infection II-GCre infected mice (Cabral  
301 et al., 2020; Koshy and Cabral, 2014). As the PV excludes GFP expressed by the host  
302 cell, we looked for areas within the GFP<sup>+</sup> neurons devoid of GFP (Fig 5A, B) and then  
303 confirmed that these areas contained parasites using Hoechst staining of the parasite  
304 DNA (Fig 5B). Out of 22 reconstructed GFP<sup>+</sup> neurons, we found that 9 (~40%) showed  
305 no evidence of persistent parasite infection (Fig 5C, D). These data highly suggest that  
306 *in vivo*, a percentage of murine neurons clear intracellular parasites.

307

### 308 **IFN- $\gamma$ stimulated human neurons show resistance to *T. gondii* infection**

309 Having shown that murine neurons clear a portion of intracellular parasites *in vitro* and  
310 *in vivo*, we sought to translate these findings to human neurons. While mice and murine  
311 cells are good models for human infection (both are naturally infected with *T. gondii*,  
312 have the CNS as a major organ of persistence, have neurons as the major host cell for  
313 cysts, and require IFN- $\gamma$  and CD8 T cells to control toxoplasmosis), differences exist  
314 between the two. In the current context, the most relevant difference is that human cells  
315 lack the expansive range of Irgms that mice have and instead rely on alternative cell-  
316 specific mechanisms for IFN- $\gamma$ -dependent control of *T. gondii* (Fisch et al., 2019). To

317 determine how IFN- $\gamma$  stimulation influenced control of *T. gondii* in human neurons, we  
318 derived human neurons (huSC neurons) from human neuroprogenitor cells  
319 reprogrammed from an embryonic stem cell line. After confirming that the huSC  
320 neurons expressed appropriate cortical neuronal markers (**Fig S5**), we used these  
321 huSC neurons for the *T. gondii* clearance assay. We pre-treated the huSC neurons with  
322 human IFN- $\gamma$  for 24 hours, followed by infection with type II or III parasites. We then  
323 monitored the rate of neuron infection at 3, 12, and 24 hpi. At 3 hpi, regardless of  
324 infecting strain, we found equivalent neuron infection rates between unstimulated and  
325 IFN- $\gamma$  stimulated cultures. At 12 and 24 hpi, IFN- $\gamma$  stimulated cultures showed an ~50%  
326 decrease in the number of infected neurons compared to unstimulated cultures (**Fig 6**).

327

## 328 **Discussion**

329 In this study, we sought to address the question: can neurons directly clear intracellular  
330 parasites? Using *in vitro* primary murine neurons from wild-type and transgenic mice in  
331 combination with IFN- $\gamma$  pre-stimulation and transgenic parasites, this work shows that a  
332 portion of neurons can and do clear intracellular parasite in an IFN- $\gamma$ -dependent, IRG-  
333 dependent manner. Using our new GCre parasites, which trigger host cell mediated  
334 recombination only after full invasion, we also show that ~ 40% of neurons clear  
335 parasites *in vivo*. Finally, using huSC neurons, we translated our findings to human  
336 neurons, showing that IFN- $\gamma$  pre-stimulation decreases the infection rate by ~50%.

337

338 The data presented are the first to show that IFN- $\gamma$  pre-stimulation enables human and  
339 murine neurons to partially resist infection by an intracellular eukaryotic pathogen. In

340 murine neurons, we leveraged *T. gondii* biology to show that this resistance was  
341 secondary to clearance of intracellular parasites (**Fig 2A, B**), not simply an invasion  
342 defect (an important distinction in cultures where procedures such as aggressively  
343 washing off extracellular parasites cannot be done). In addition, our finding that IFN- $\gamma$   
344 stimulated murine neurons clear parasites in an IRG-dependent manner explains why a  
345 prior study found that IFN- $\gamma$  stimulated primary murine neurons failed to clear  
346 intracellular parasites. The prior study, which was done at a time when neither the IRGs  
347 nor the parasite mechanisms to block the IRGs had been fully described, used a type I  
348 strain (RH) that we now know is IRG-resistant (Hermanns et al., 2016; Schluter et al.,  
349 2001). In human neurons, we currently cannot distinguish between an IFN- $\gamma$ -dependent  
350 invasion defect or clearance of intracellular parasites or both. Though we cannot  
351 distinguish between these possibilities, the IFN- $\gamma$ -dependent, anti-parasite effect  
352 appears to have a more robust effect on huSC neuron infection rates compared to  
353 murine neurons. What mechanisms underlie this impressive IFN- $\gamma$ -dependent  
354 resistance to *T. gondii* infection will be the subject of future studies.

355

356 Though we have shown that IFN- $\gamma$ -stimulated neurons can clear parasites in an IRG-  
357 dependent manner, our data also suggests that major cell-specific differences in IRG  
358 efficiency exist. We found that *in vitro*, ~ 20-25% of intracellular parasites will be cleared  
359 by neurons in an IFN- $\gamma$ , IRG-dependent manner, while other groups have shown that  
360 IFN- $\gamma$  stimulated murine astrocytes, macrophages, and fibroblasts have higher rates of  
361 Irga6<sup>+</sup> loading (50-75%) and clearance over a much shorter time (1-2 hours post-  
362 infection) (Khaminets et al., 2010; MacMicking, 2012; Martens et al., 2005). While some



363 of the difference may be secondary to technical differences (e.g. use of antibody vs.  
364 transfection of Irga6-tagged with GFP, different MOIs), part of the difference is likely  
365 secondary to a blunted cell-intrinsic immune response from neurons (as suggested by  
366 the undetectable levels of baseline STAT1). Other, not mutually exclusive possibilities  
367 include that IRG-clearance differs between neuronal subcellular locations (i.e. it might  
368 be expensive to put IRG-machinery along the whole neuron) and/or that full neuron  
369 responses require direct interactions with other cell types such as astrocytes or T cells.  
370 Our *in vivo* data using GCre parasites are consistent with the possibility that other cell  
371 types influence neuronal clearance of intracellular parasites. *In vivo* we found that ~  
372 40% of GCre-triggered GFP<sup>+</sup> neurons do not harbor parasites (**Fig 5**). This rate of  
373 neuronal clearance is approximately double what we observed *in vitro*. In the *in vivo*  
374 setting, neurons are in constant communication with other cell types (e.g. astrocytes,  
375 microglia, infiltrating T cells), which may potentiate IRG-dependent clearance or initiate  
376 complementary methods for clearing intracellular parasites (e.g. CD40-dependent  
377 xenophagy (Andrade et al., 2006; Subauste, 2009)). Future studies will focus on  
378 defining these *in vivo* vs. *in vitro* differences.

379

380 In summary, our findings offer substantial evidence that IFN- $\gamma$  pre-stimulation enables  
381 murine and human neurons to mount anti-parasitic defenses against *T. gondii*. While  
382 much work is left to be done to understand these anti-parasitic defenses, the work  
383 presented here suggests that *T. gondii*'s persistence in neurons is not simply a foregone  
384 conclusion.

385

## 386 **Acknowledgements**

387 The authors would like to thank all members of the Koshy Lab for helpful discussions  
388 and critical review of the manuscript. We would like thank Greg Taylor (Duke  
389 University), for providing us with breeding pairs for *Irgm1*<sup>3/-</sup>, Jonathan Howard  
390 (Instituto Gulbenkian de Ciência), for providing us with anti-Irga6 antibodies. Finally, we  
391 thank Dr. Jared Churko (University of Arizona) and Dr. Rita Sattler (Barrow Neurological  
392 Institute) and their lab members for support with human neuron differentiations.  
393 Funding was provided by the National Institutes of Health (NS095994 (AAK); AI147711  
394 (JAK)) and the BIO5 Institute, University of Arizona (A.A.K). The funders had no role in  
395 study design, data collection and analysis, decision to publish, or preparation of the  
396 manuscript.

397

## 398 **Author Contributions**

399 **Conceptualization:** Sambamurthy Chandrasekaran, Joshua Kochanowsky, Anita A.  
400 Koshy.

401 **Methodology:** Sambamurthy Chandrasekaran, Joshua Kochanowsky, Emily F. Merritt,  
402 Anita A. Koshy.

403 **Validation:** Sambamurthy Chandrasekaran, Joshua Kochanowsky, Emily F. Merritt

404 **Formal analysis:** Sambamurthy Chandrasekaran, Joshua Kochanowsky, Emily F.  
405 Merritt, Anita A. Koshy.

406 **Investigation:** Sambamurthy Chandrasekaran, Joshua Kochanowsky, Emily F. Merritt,  
407 Anita A. Koshy.

408 **Data curation:** Sambamurthy Chandrasekaran, Joshua Kochanowsky, Emily F. Merritt

409 **Writing – original draft:** Sambamurthy Chandrasekaran

410 **Writing – review & editing:** Anita A. Koshy

411 **Supervision:** Anita A. Koshy

412 **Funding acquisition:** Joshua A. Kochanowsky, Anita A. Koshy

413

## 414 **Declaration of Interests**

415 The authors have declared that no competing interests exist.

416

## 417 **Materials and Methods**

### 418 **Parasite maintenance**

419 The parasite strains used in this study were maintained through serial passage in  
420 human foreskin fibroblasts (HFFs) using DMEM, supplemented with 10% fetal bovine  
421 serum (FBS), 2mM Glutagro and 100 IU/ml penicillin and 100 µg/ml streptomycin.  
422 Except for the type II (Prugniaud) strain that expresses Gra16::Cre (II-GCre), the *T.*  
423 *gondii* strains used have been previously described (Cabral et al., 2016; Koshy et al.,  
424 2012). To engineer the II-GCre strain, type II parasites were electroporated with a  
425 plasmid encoding Cre recombinase fused to the dense granule protein, Gra16, and a  
426 separate drug-selectable marker (Donald et al., 1996). Single clones were selected by  
427 limiting dilution.

428

### 429 **Mice**

430 All procedures and experiments were carried out in accordance with the Public Health  
431 Service Policy on Human Care and Use of Laboratory Animals and approved by the

432 University of Arizona's Institutional Animal Care and Use Committee (#12-391). All mice  
433 were bred and housed in specific-pathogen-free University of Arizona Animal Care  
434 facilities. Cre reporter mice (Madisen et al., 2010) (#007906) were originally purchased  
435 from Jackson Laboratories. Breeding pairs of *Irgm1/m3<sup>-/-</sup>* (*Irgm1/3* KO) mice (Collazo et  
436 al., 2001) were generously provided by Greg Taylor (Duke University, Durham, NC).

437

#### 438 ***In vivo* infection with GCre parasites**

439 Cre reporter mice were intraperitoneally infected with 10,000 or 20,000 freshly lysed  
440 Gra16-Cre (GCre) tachyzoites. Mice were anesthetized 21 days post infection,  
441 harvested brains were drop fixed in 4% PFA and stored overnight at 4°C before being  
442 transferred and stored in 30% sucrose until they were sectioned. *T. gondii* infected,  
443 sucrose embedded brains were sagittal sectioned to 200 µm on a vibratome and stored  
444 in cryoprotectant media (0.05 M sodium phosphate buffer containing 30% glycerol and  
445 30% ethylene glycol). Sections were cleared using a modified PACT clearing protocol  
446 previously described (Cabral et al., 2020). In brief, sections were incubated overnight in  
447 a hydrogel monomer solution at 4 degrees Celsius and deoxygenated the next morning  
448 by bubbling nitrogen gas into sample vials. Samples were incubated at 42 degrees  
449 Celsius to initiate crosslinking of proteins, washed, and incubated in 8% sodium dodecyl  
450 sulfate (SDS) at 45 degrees Celsius to remove lipids. After multiple wash steps to  
451 remove SDS from the sections, nuclei were stained using hoechst. Samples were then  
452 washed and submerged in sorbitol refractive index matching solution (sRIMS)  
453 consisting of 70% Sorbitol and 0.01% NaN<sub>3</sub> dissolved in 0.02M PB overnight before  
454 being mounted and imaged on a Zeiss NLO 880 confocal microscope (Imaging Core –

455 Marley, University of Arizona). Brain sections were mounted for imaging on spacer  
456 slides in fresh sRIMS (Koshy and Cabral, 2014).  
457 Images were obtained at 40x magnification to ensure visualization of parasite nuclei.  
458 We created z-stack tile scans of each neuron to ensure capturing as much of the  
459 neuron's axon and processes as were available in each section. Stitched images were  
460 converted to Imaris files and imported into Bitplane Imaris software, where neuronal  
461 projections were rendered using the filaments tool.

### 462 **Primary murine neuron culturing**

463 The primary neurons were cultured by methods described previously with minor  
464 modifications (Parker et al., 2018). The culturing plates were prepared by coating  
465 overnight with 0.001% poly-L-lysine (Sigma, Cat # P4707) solution for plastic surfaces  
466 and 100 µg/ml poly-L-lysine hydrobromide (Sigma, Cat # P6282) for glass surfaces.  
467 Neurons were seeded in plating media at appropriate densities: 500,000 in 6-well plates  
468 for RNA and protein extraction, 100,000 in 24 well plates with coverslips for imaging and  
469 20,000 in 96 well plates for counting. Four hours after plating, full volume media  
470 exchange to neurobasal media (Thermo Fisher, Cat # 21103049) was performed. On  
471 day in vitro (DIV) 4, neurons received a half volume media change of neurobasal media  
472 with 5 µM cytosine arabinoside to stop glial proliferation. One third media exchanges  
473 with neurobasal media occurred every 3-4 days thereafter. All the experiments were  
474 performed on 12 DIV neurons.

475

### 476 **IFN-γ stimulation and *T. gondii* infection**

477 The primary neurons were pre-stimulated with 100 U/ml of mouse recombinant IFN- $\gamma$  for  
478 4h & 24h (RNA extraction), 24h & 48h (protein extraction), or 24h (*T. gondii* infections).  
479 Freshly syringe-lysed *T. gondii* parasites resuspended in neurobasal media were used  
480 to infect the primary neurons at MOI=4 (For 3 hpi), MOI=2 (For 12 hpi), MOI=1 (For 24  
481 hpi) and MOI=0.2 (for 48 and 72 hpi) time points.

482

### 483 **Quantitative real time PCR**

484 For quantification of the genes, RNA was extracted from 4h and 24h stimulated primary  
485 neurons using TRIzol reagent (Life technologies) and following the manufacturer's  
486 protocol. 500 ng of total RNA was converted into first strand cDNA using a High-  
487 Capacity cDNA Reverse Transcription Kit (Applied Biosystems<sup>TM</sup>; Cat No: 4368814) and  
488 following the manufacturer's instructions. Using the primer listed in Table 1, IFN- $\gamma$   
489 response and IRG pathway genes were amplified using SYBR green fluorescence  
490 detection with an Eppendorf Mastercycler ep realplex 2.2 system. GAPDH was used  
491 as a housekeeping gene to normalize DNA levels. Results were calculated using the 2<sup>-</sup>  
492  $\Delta\Delta CT$  method (Livak and Schmittgen, 2001).

493

### 494 **Protein extraction and Western blotting**

495 Primary neurons were either unstimulated or stimulated with IFN- $\gamma$  for 24h and 48h,  
496 followed by total protein extraction as previously described (Cabral et al., 2017). Equal  
497 amounts of protein were subjected to SDS-PAGE, transferred to PVDF membrane and  
498 western blotting was done by standard methods. The blots were imaged using the  
499 Odyssey Infrared Imaging Systems (LI-COR Biosciences).

500

501 **Neuronal clearance assay**

502 Primary neurons (wildtype or *Irgm 1/3* KO) plated were plated on a poly-L-lysine coated  
503 96-well plate (20,000/well) and were either unstimulated or pre-stimulated with IFN- $\gamma$  for  
504 24h prior to infection with *T. gondii* parasites. The cells were labeled with anti-NeuN  
505 (neuronal nuclei), DAPI (all nuclei) and parasites were mcherry positive, wells were  
506 imaged using an Operatta CLS high content analysis microscope (Functional Genomics  
507 Core, University of Arizona). Generated images were then analyzed using Image J  
508 software. The results were represented as percent decrease in the infected neurons in  
509 stimulated compared to the unstimulated group.

510

511 For assays involving GCre parasites, neurons from either wildtype (Cre reporter) or Cre  
512 reporter *Irgm 1/3* KO mice were plated on poly-L-lysine coated 6 well plate  
513 (500,000/well). At the appropriate DIV, the neurons were either unstimulated or pre-  
514 stimulated with IFN- $\gamma$  for 24h followed by infection with II-GCre parasites. At 72 hrs  
515 post-infection, the plates were processed as described above. These fixed and stained  
516 plates were then analyzed using an epifluorescent microscope (EVOS). The person  
517 analyzing the images was blinded to the IFN- $\gamma$  stimulation and/or infecting parasite  
518 strain.

519

520 **Immunofluorescence assay**

521 Cells were grown on poly-L-lysine-coated glass coverslips (described above) and were  
522 processed by methods as previously described (Parker et al., 2018).

523

## 524 **Antibodies**

525 The following primary antibodies were used in the study: mouse anti-tubulin beta III  
526 isoform (Tuj1), clone TU20 (MAB1637, Millipore, 1:1000); rabbit anti-  $\beta$ 3-Tubulin, D71G9  
527 (similar to Tuj1) (5568S, CST, 1:1000); mouse anti-NeuN clone A60 (MAB377, Millipore,  
528 1:1000); rabbit anti-Glial Fibrillary Acidic protein (GFAP) (Z0334, DAKO, 1:500); rabbit  
529 anti S100 (Z0311, DAKO, 1:500); rabbit anti-ALDH1L1 (Ab87117, Abcam, 1:500);  
530 chicken anti-Iba1 (Ab 139590, Abcam, 1:500), rabbit anti-STAT1 (Ab47425, Abcam;  
531 1:500); mouse anti-pSTAT1 pY701 clone14/p-STAT1 (612132, BD Biosciences, 1:250);  
532 rabbit anti-pSTAT1 Tyr701, Clone 58D6 (9167, CST, 1:200); mouse anti-SAG1 DG52  
533 (gift John Boothroyd, 1:10,000); mouse anti-SRS-9 (gift John Boothroyd, 1:10,000);  
534 mouse anti-Irga6 (1:1500), mouse anti-Irgb6 (1:250) (gift Jonathan Howard); rabbit anti-  
535 HA C29F4 (3724S, CST, 1:500); mouse anti-ROP2/3/4 (1:1000, gift John Boothroyd);  
536 DAPI (D3571, Thermo Fisher, 1:1000); Hoechst 33342 Trihydrochloride, Trihydrate  
537 (H3570, Thermo Fisher, 1:1000). The following species-appropriate secondary  
538 antibodies were used: Alexa Fluor 405 goat anti-rabbit IgG, Alexa Fluor 488 goat anti-  
539 mouse IgG, Alexa Fluor 568 goat anti-rabbit IgG, Alexa Fluor 647 goat anti-mouse IgG,  
540 Alexa Fluor 647 goat anti-chicken IgG, Alexa Fluor 647 goat anti-rabbit IgG, donkey  
541 anti-mouse IgG, DyLight 680 conjugate (1:10000), and donkey anti-rabbit IgG, DyLight  
542 800 conjugate (1:10000). Unless otherwise noted, secondary antibodies were obtained  
543 from Life Technologies and used at a concentration of 1:500.

544

## 545 **Human stem cell derived neurons**



546 H7 human embryonic Neural stem cells (NSCs) derived from the NIH-approved H7  
547 embryonic stem cells (WiCell WA07) were purchased from the University of Arizona  
548 iPSC core (<https://stemcells.arizona.edu/>). The NSCs were expanded and differentiated  
549 into cortical layer neurons using a previously described protocol (Yan et al., 2013) with  
550 minor modifications. Briefly, NSCs were expanded on Matrigel<sup>®</sup> Matrix (Corning<sup>®</sup>,  
551 #354277) coated plates using NSC expansion medium (NEM) (ThermoFisher, Cat #  
552 A1647801). The media was changed every other day until NSCs reached confluence.  
553 The passaged NSCs were used at P2 for differentiation into cortical neurons by plated  
554 them on poly-L-ornithine (20ug/ml) (Sigma, Cat # P4957) and laminin (5ug/ml) (Thermo  
555 Fisher, Cat # 23017015) coated plates. For 14 days, the cells were differentiated into  
556 cortical neurons using neural differentiation medium (NDM) consisting of Neurobasal  
557 medium, 2mM L-Glutamine (Thermo Fisher, Cat # 25030024 ), 1% B-27 (Thermo  
558 Fisher, Cat # 17504044), 200µM L- Ascorbic acid (Sigma, Cat # A92902), 0.5mM c-  
559 AMP (Stem Cell Technologies Cat # 73886), 20ng/ml BDNF (Stem Cell Technologies  
560 Cat # 78005), 20ng/ml GDNF (Stem Cell Technologies Cat # 78058), 20ng/ml NT-3  
561 (Stem Cell Technologies Cat # 78074), and Penicillin/Streptomycin (Thermo Fisher, Cat  
562 # 15140122) cocktail. The culture medium was exchanged with fresh NDM every 2-3  
563 days.

564

### 565 **Human neuronal clearance assay**

566 The clearance assay in human neurons was performed as described for primary pure  
567 murine neurons except that human IFN-γ (R&D Systems, Cat # 285-MI-100) was used  
568 for pre-stimulation.

569

570 **Statistical Analyses**

571 Graphs were generated and statistical analyses were performed using Graphpad Prism

572 9.1.2 software. The specific test used (e.g., ANOVA vs. t-test) is noted in each figure.

573

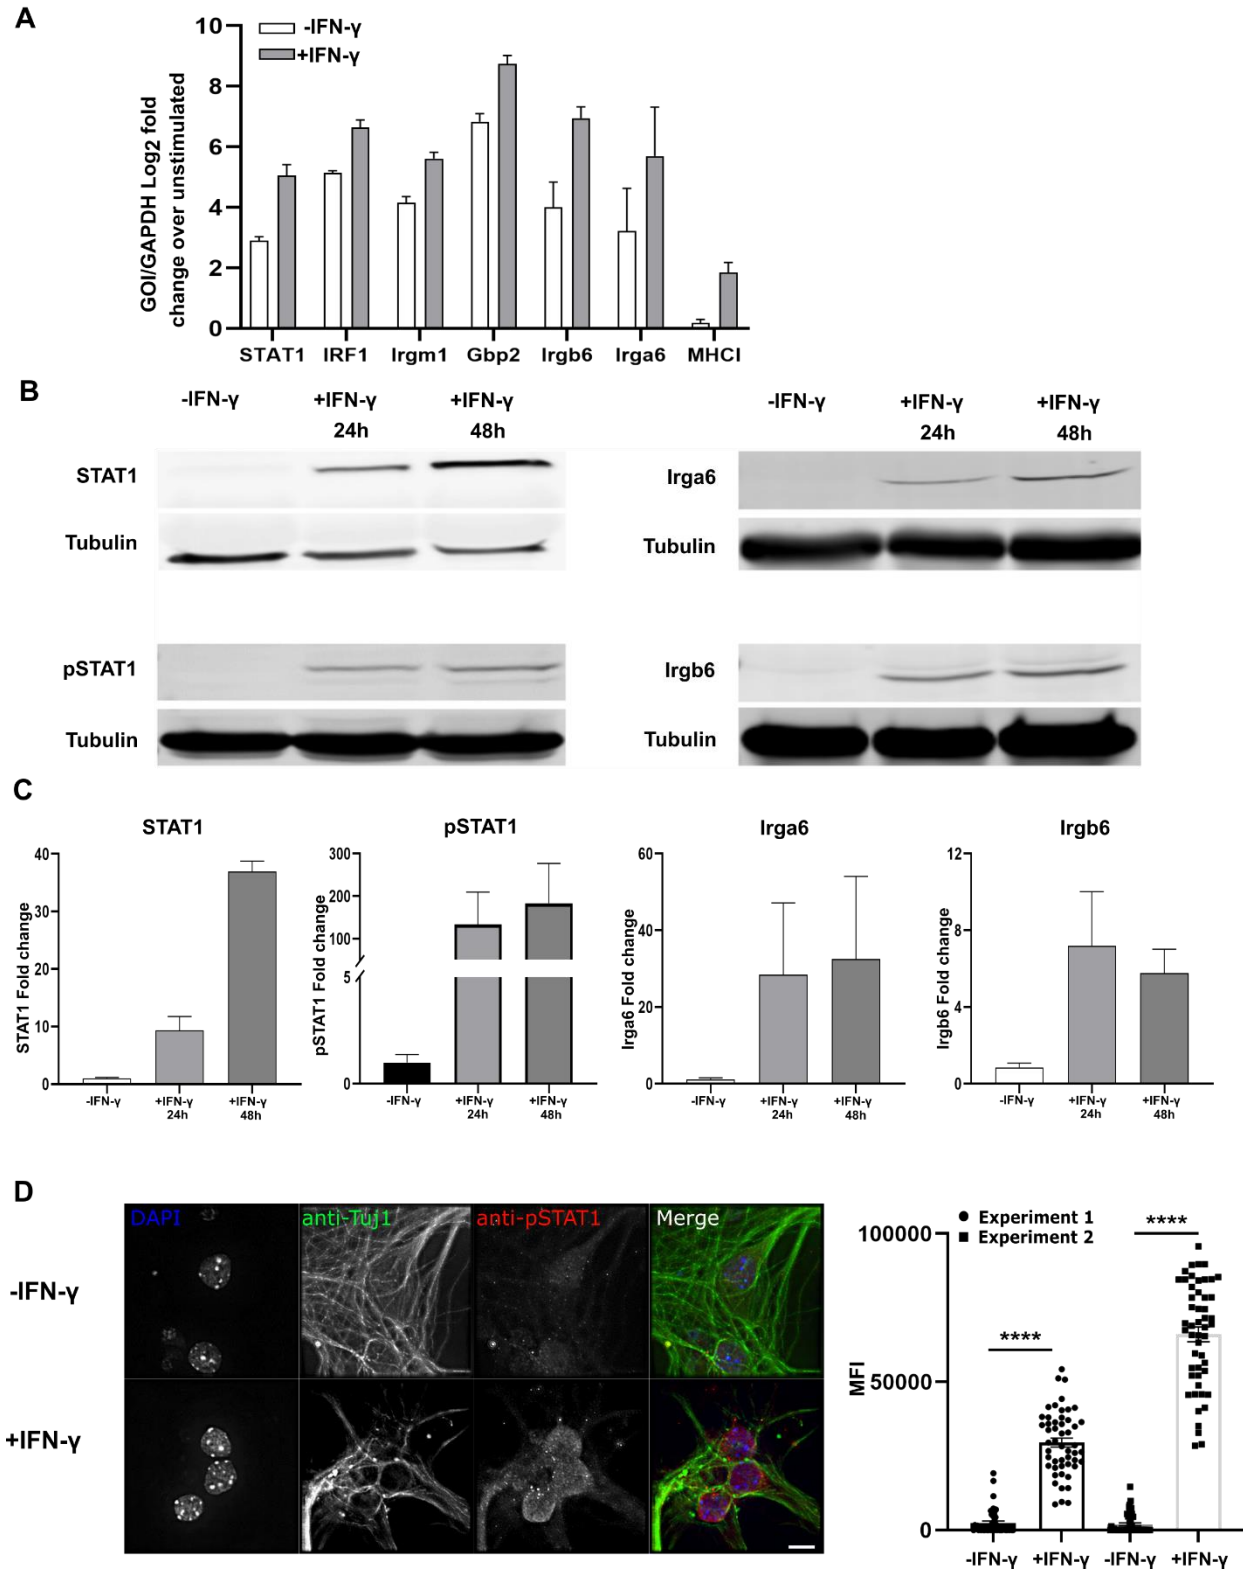

574

575 **Fig 1. IFN- $\gamma$  stimulated primary murine neurons show intact IFN- $\gamma$  signaling**  
576 **pathway and express genes involved in *T. gondii* clearance.**  
577 Primary neurons were cultured for 12 days *in vitro* (DIV), after which they were  
578 stimulated with vehicle or IFN- $\gamma$  (100 U/ml). At the listed times, RNA or protein was  
579 isolated or immunofluorescent assays were performed. **A.** Quantification of specified  
580 genes using quantitative PCR. Expression is shown as Log<sub>2</sub> fold change compared to  
581 unstimulated cultures. **B.** Representative images of western blots for specified proteins  
582 from unstimulated and IFN- $\gamma$  stimulated neuron cultures. **C.** Densitometric quantification  
583 of western blots from (**B**). Densitometry of given gene is normalized to densitometry of  
584  $\beta$ -tubulin and then shown as fold change compared to unstimulated cultures. For (**A, C**)  
585 Bars, mean  $\pm$  SEM. N = 3 independent experiments. **D. Images:** Representative images  
586 of unstimulated or IFN- $\gamma$  stimulated neurons stained as indicated (anti-Tuj1 antibodies  
587 stains neurons). Scale bar = 5 $\mu$ m. *Graph:* Quantification of the mean fluorescent  
588 intensity (MFI) of pSTAT1 nuclear signal in unstimulated or IFN- $\gamma$  stimulated Tuj1<sup>+</sup> cells  
589 (neurons). N = 48-51 nuclei evaluated/condition/experiment, 2 independent  
590 experiments. Bars, mean  $\pm$  SD. \*\*\*\*p  $\leq$  0.0001, unpaired t-test with Welch's correction.

591

592

593

594

595

596

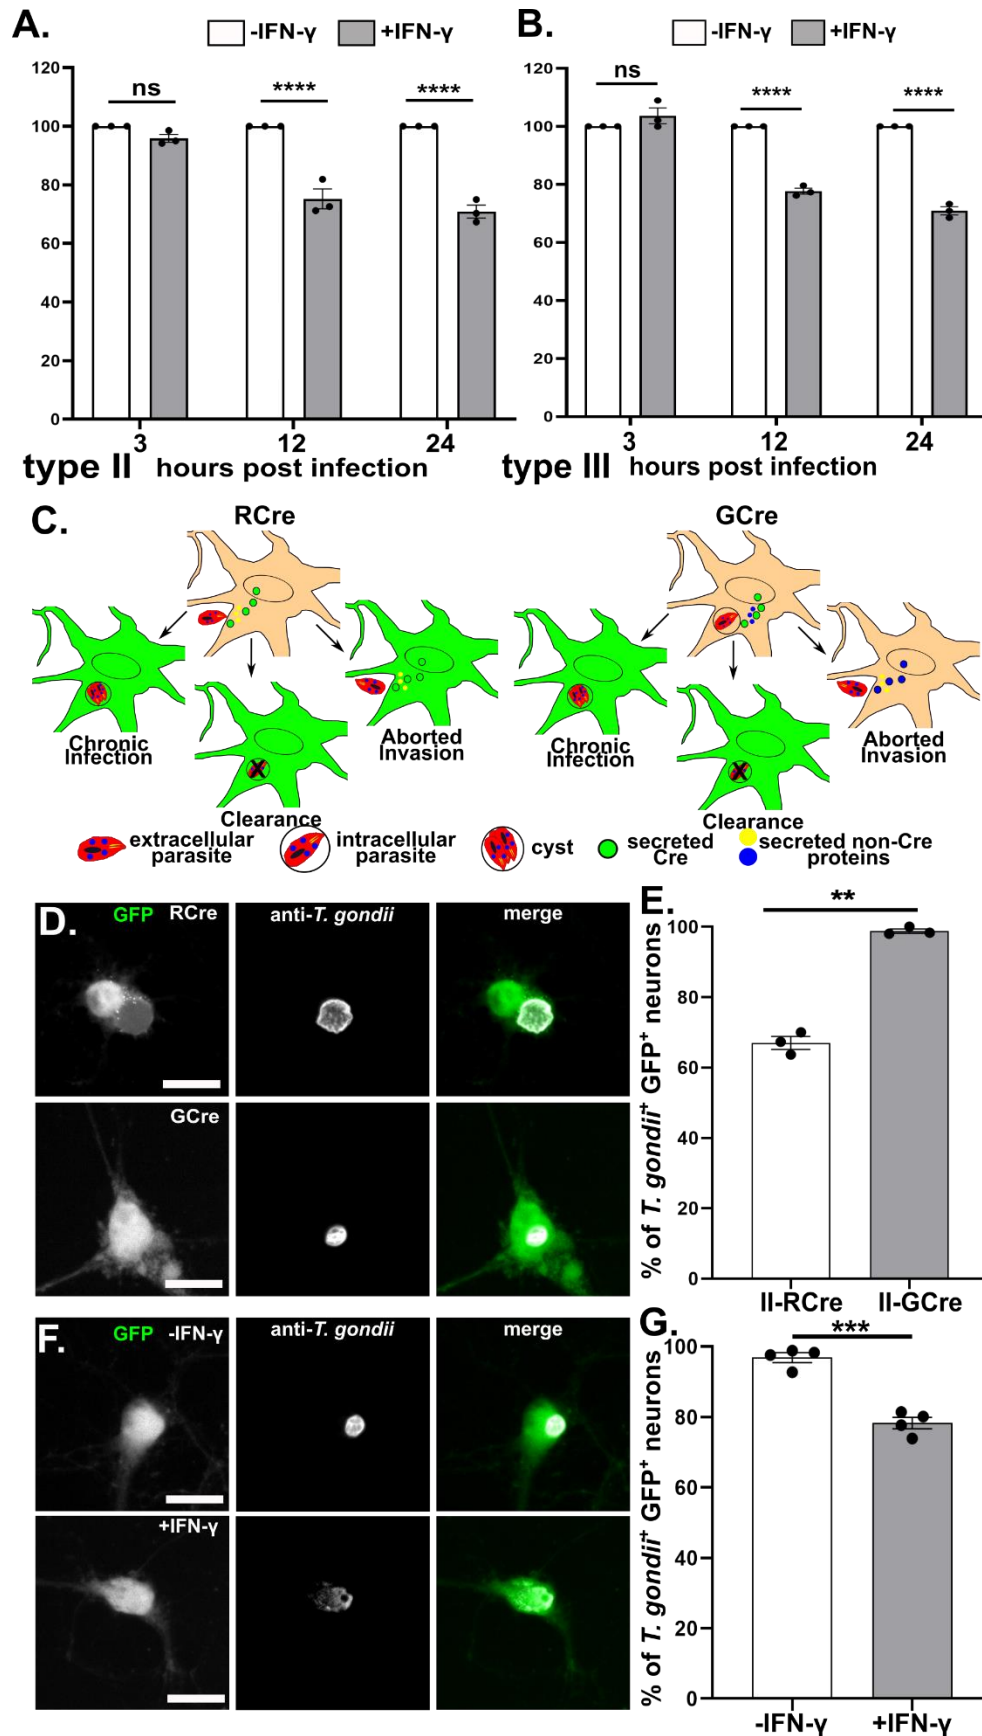

598 **Fig 2. IFN- $\gamma$  stimulated neurons clear intracellular parasites.**

599 Primary neurons were cultured and stimulated as in Fig 1. **A.** Graph of the percentage  
600 of infected neurons at listed time points for type II parasites, normalized to the  
601 unstimulated culture. **B.** As in **(A)** except for type III parasites. **(A, B)** Primary neurons  
602 were stimulated with IFN- $\gamma$  (100U/ml) or vehicle for 24hrs, after which the cultures were  
603 infected with type II or type III parasites. At the listed time points, cultures were fixed,  
604 stained with anti-NeuN antibodies (stains neuron nuclei) and DAPI, and analyzed on an  
605 Operatta CLS high content analysis microscope. Bars mean  $\pm$  SEM. N = 25-30 FOV  
606 (~750-1000 neurons/experiment), 3 independent experiments. \*\*\*\*p<0.0001. ns = not  
607 significant, 2-way ANOVA with Sidak's multiple comparisons. **C.** Schematic of host cells  
608 labeled by RCre versus GCre parasites. *Left*, In the RCre system the Cre fusion protein  
609 is secreted prior to invasion of neurons, which leads to GFP-expressing neurons that  
610 can arise from: i) injection, invasion, and chronic infection, ii) injection and invasion of  
611 host cell followed by host cell killing or clearance of the parasite, iii) injection of the  
612 protein without invasion (aborted invasion). *Right*, In the GCre system the Cre fusion  
613 protein is secreted post invasion, which leads to GFP-expressing neurons that can arise  
614 from: i) invasion and persistent infection or ii) invasion followed by killing or clearance of  
615 the parasite, but not from aborted invasion. **D.** Representative images of GFP<sup>+</sup> neurons  
616 infected with RCre or GCre parasites. *Merge image*: Green = GFP-expression in  
617 neurons, white = parasites stained with anti-*T. gondii* antibodies (a cocktail of anti-SAG1  
618 and anti-SRS9 antibodies to capture both tachyzoites and bradyzoites.) Scale bar = 10  
619  $\mu$ m **E.** Graph of the percentage of actively infected GFP<sup>+</sup> neurons at 72 hpi  
620 (unstimulated cultures). **F.** Representative images of unstimulated or IFN- $\gamma$  (100 U/ml)

621 stimulated primary neurons infected with GCre parasites for 72hrs. *Merge image*, as in  
622 **(D)**. Scale bar = 10  $\mu$ m **G**. Graph of the percentage of actively infected GFP<sup>+</sup> neurons at  
623 72 hpi. **(E, G)** Bars mean  $\pm$  SEM. N  $\geq$  200 GFP<sup>+</sup> neurons/well, 3 wells/experiment, 3-4  
624 independent experiments. \*\*p  $\leq$  0.005, \*\*\*p  $\leq$  0.0005, t-test with Welch's correction.

625

626

627

628

629

630

631

632

633

634

635

636

637

638

639

640

641

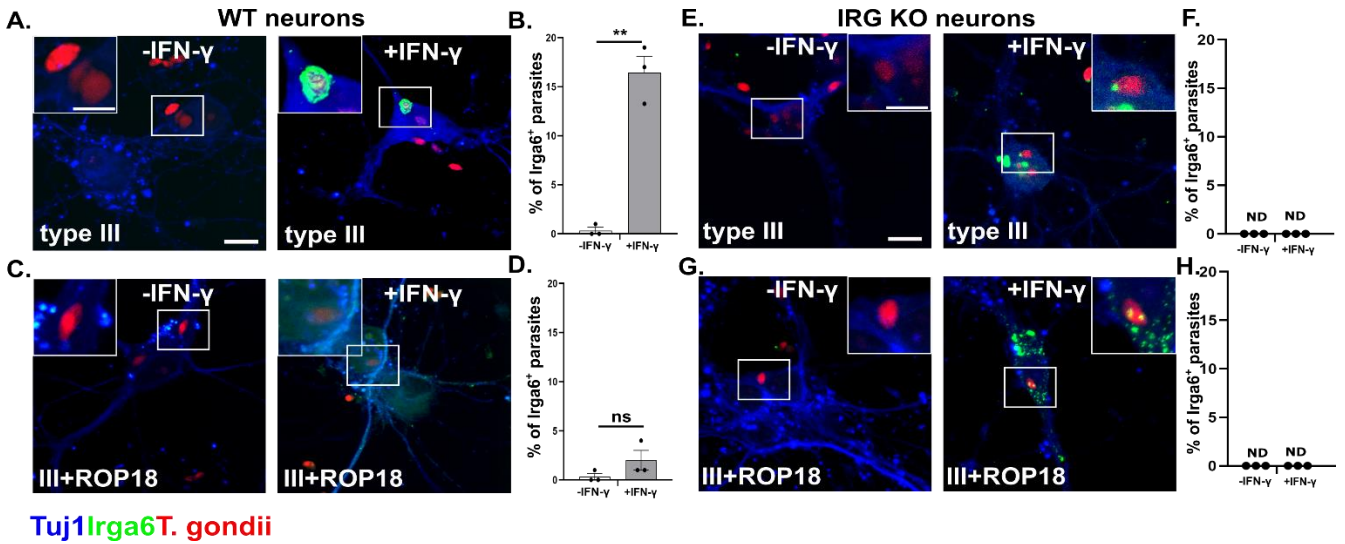

643 **Fig 3. IFN- $\gamma$  stimulated wild-type murine show increased loading of Irga6 onto the**  
644 **PVM of type III parasites.**

645 Primary neurons were cultured as in Fig 1, followed by 24 hours of IFN- $\gamma$  (100U/ml) or  
646 vehicle stimulation, after which cultures were infected with listed *T. gondii* strains. At 12  
647 hours post infection, cultures were fixed and stained with anti-Irga6 and anti-Tuj1  
648 antibodies. The stained cultures were analyzed by confocal microscope. **A.**  
649 Representative images of stained cultures from wild-type (WT) mice infected with type  
650 III parasites and pre-stimulated with vehicle or IFN- $\gamma$ . Blue = anti-Tuj1 antibodies, Green  
651 = anti-Irga6 antibodies, Red = mCherry expressing parasites. **B.** Quantification of the  
652 percentage of Irga6<sup>+</sup> parasitophorous vacuoles (PVs) in the setting of vehicle or IFN- $\gamma$   
653 pre-stimulation. **C.** Representative images as in **(A)** except infected with III+ROP18  
654 parasites. **D.** As in **(B)**. **E.** Representative images as in **(A)** except using cultures from  
655 Irgm1/3 KO mice. Scale bar = 10  $\mu$ m full image, 5  $\mu$ m inset. **F.** As in **(B)**. **G.**  
656 Representative images as in **(C)** except using IRG KO neurons. **H.** As in **(B)**. **(B, D, F,**  
657 **H)** Bars- mean  $\pm$  SEM, N = 100-200 PVs/experiment, 3 independent experiments. ns-  
658 not significant, \*\*p  $\leq$  0.01, t-test with Welch's correction.



659

660

661

662

663

664

665

666

667

668

669

670

671

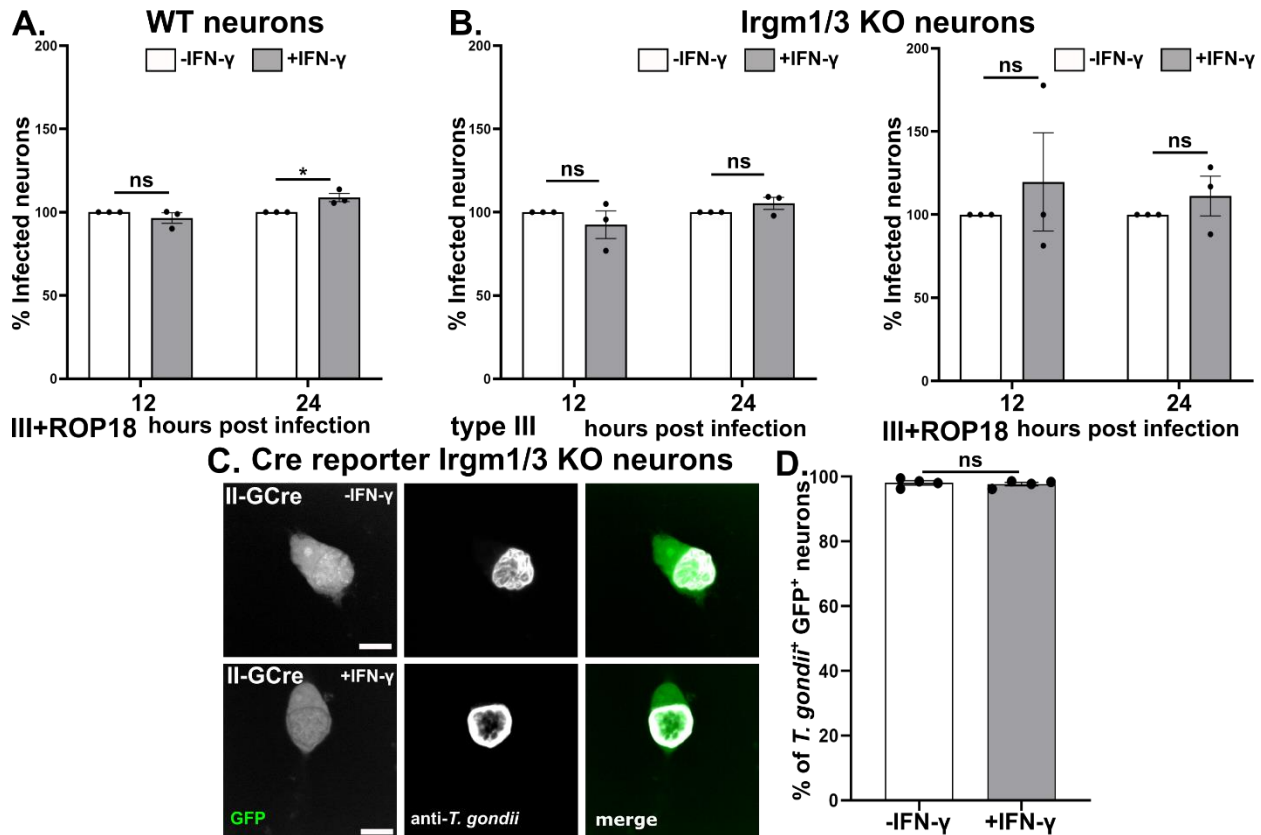

672

673 **Fig 4. An intact IRG system is required for IFN- $\gamma$ -dependent murine neurons**  
 674 **clearance of intracellular parasites.**

675 Primary neurons from wild-type (Cre reporter), Irgm1/3 KO, or Cre reporter Irgm1/3 KO  
 676 mice were cultured as in Fig 1 followed by stimulated with IFN- $\gamma$  (100U/ml) or vehicle for  
 677 24hrs, after which the cultures were infected with listed *T. gondii* strain. **A.** Graph of the  
 678 percentage of infected WT neurons at listed time points for III+ROP18 parasites,  
 679 normalized to the unstimulated culture. **B.** As in **(A)** except using Irgm1/3 KO neurons  
 680 and either type III parasites (*left graph*) or III+ROP18 parasites (*right graph*). **(A, B)** At  
 681 the listed time points, cultures were fixed, stained, and analyzed as in **Fig 2A, B.** Bars  
 682 mean  $\pm$  SEM. N = 25-30 FOV analyzed/experiment (~750-1000 neurons  
 683 analyzed/experiment), 3 independent experiments. \* $p \leq 0.05$ , ns = not significant, 2-way  
 684 ANOVA with Sidak's multiple comparisons. **C.** Representative images of GFP+ neurons

685 from Cre Reporter Irgm1/3 KO mice infected with II-GCre parasites. *Merge image:*  
686 Green = GFP-expression in neurons, White = parasites stained with anti-*T. gondii*  
687 antibodies (a cocktail of anti-SAG1 and anti-SRS9 antibodies to capture both  
688 tachyzoites and bradyzoites.) Scale bars = 10  $\mu\text{m}$  **D.** Graph of the percentage of  
689 infected GFP<sup>+</sup> neurons. Bars, mean  $\pm$  SEM. Eat dot represents the mean value of 1  
690 experiment. N = N  $\geq$  200 GFP<sup>+</sup> neurons analyzed/experiment, 4 independent  
691 experiments. ns = not significant, Welch's t test. **(C, D)** Cultures were infected, fixed,  
692 stained, and analyzed as in **Fig 2 F, G.**

693

694

695

696

697

698

699

700

701

702

703

704

705

706

707

708

709

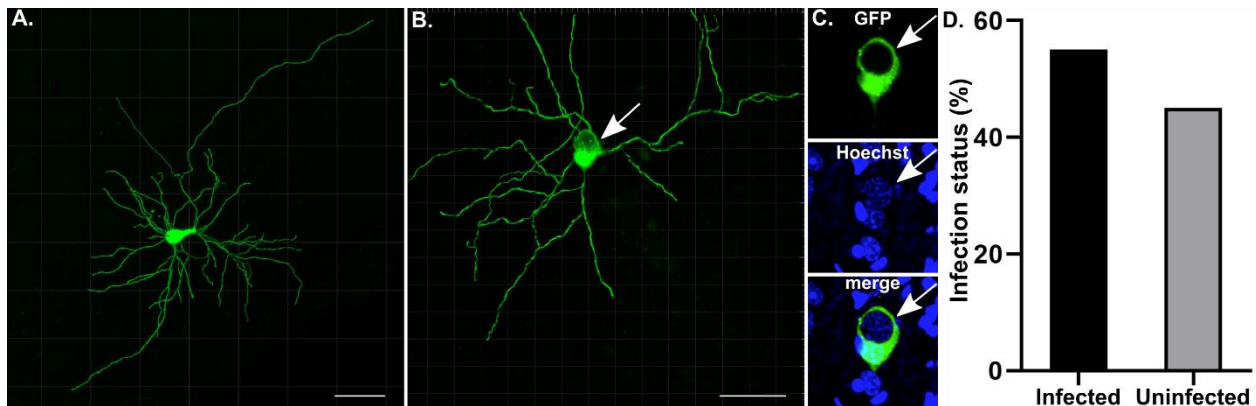

710 **Fig 5. Forty percent of GFP<sup>+</sup> neurons in mice infected with GCre parasites do not**  
711 **harbor parasites.**

712 Cre reporter mice were infected with GCre parasites. At 21 dpi, brains were harvested  
713 and sagittally sectioned into 200  $\mu$ m thick sections. Thick sections were cleared and  
714 imaged at 40x on a confocal microscope. Neurons in resulting images were then  
715 rendered using Imaris software. **A.** A representative rendering of a GFP<sup>+</sup> neuron in  
716 which no parasites were identified. **B.** As in (A) except now with a GFP<sup>+</sup> neuron in  
717 which parasites were identified. White arrow shows parasites within neuron soma. **C.**  
718 Single plane of soma from (B) *top image*: GFP channel, *middle image*: blue channel  
719 (Hoechst), *bottom image*: merge. Note the GFP displacement, suggesting parasite  
720 presence within the neuron, which is then confirmed by visualization of parasite nuclei  
721 stained with hoechst (blue). **D.** Graph of rendered GFP<sup>+</sup> neurons containing parasites  
722 (infected) or not containing parasites (uninfected). N = 22 neurons from 4 mice.

723

724

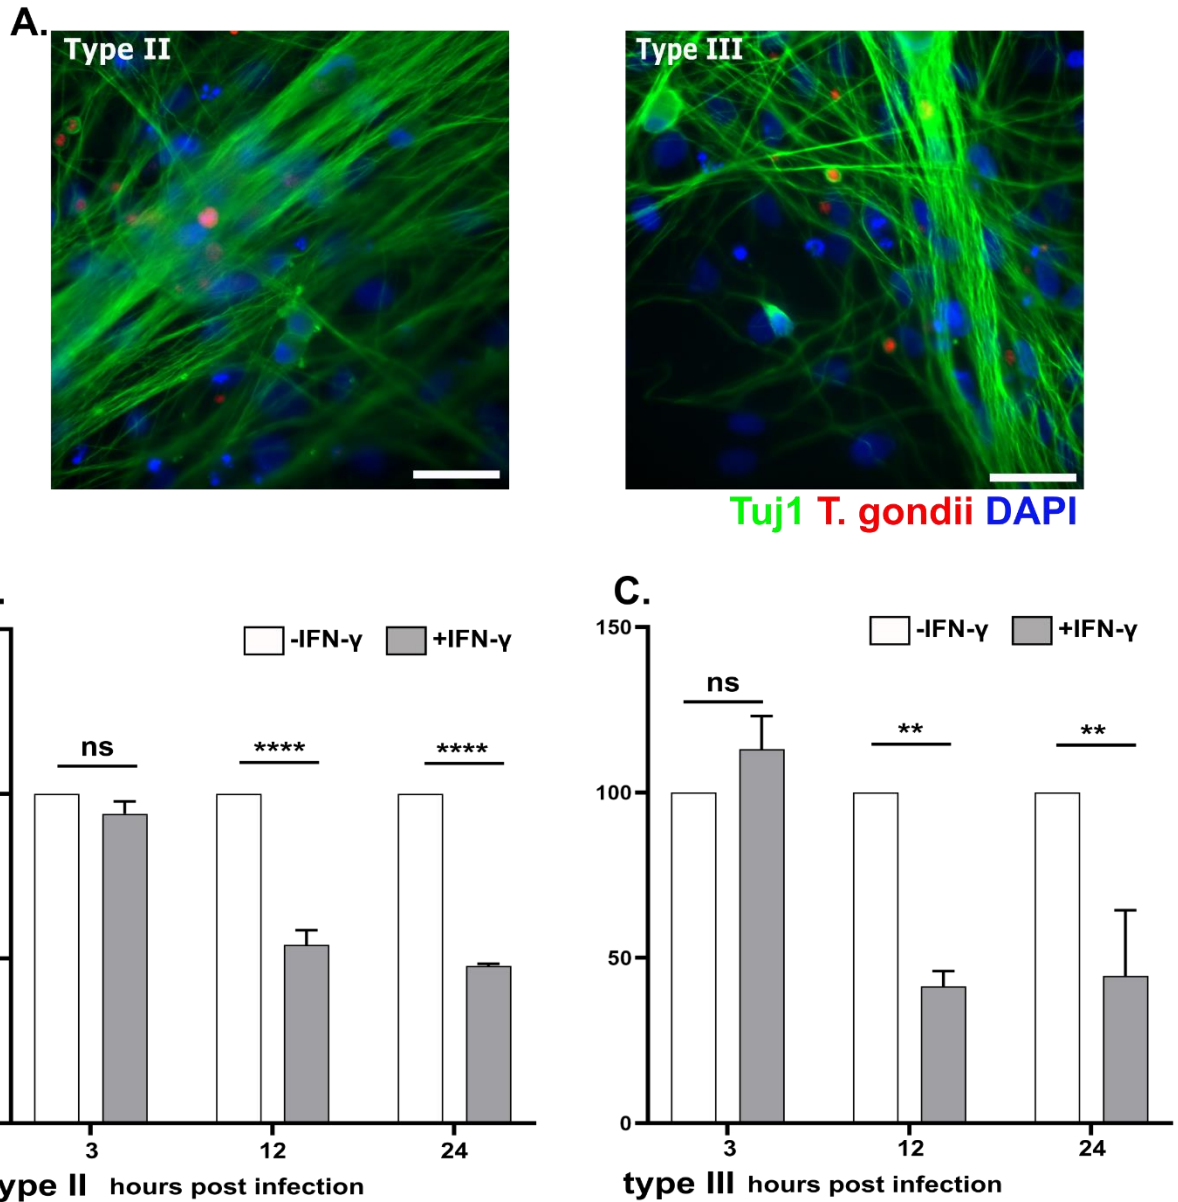

725

726

727 **Fig 6. IFN- $\gamma$  stimulation of human neurons leads to a decrease in the percentage**

728 **infected with *T. gondii*.**

729 Human neurons were differentiated for 14 DIV from neural stem cells, after which they

730 were stimulated with vehicle or IFN- $\gamma$  (100 U/ml). At listed time points, cultures were

731 fixed, stained with anti-Tuj1 antibodies and DAPI, and analyzed on an Operatta CLS

732 high content analysis microscope. **A.** Representative images of human neurons infected

733 with either type II or III parasites. Green = anti-Tuj1, Red = mCherry expressing  
734 parasites, Blue = DAPI. Scale bars = 10  $\mu$ m **B.** Graph of the percentage of infected  
735 neurons at listed time points for type II parasites, normalized to the unstimulated culture.  
736 **C.** As in **(B)** except for type III parasites. Bars mean  $\pm$  SD. N = 7-20 FOV (~1000-1500  
737 neurons/experiment), 2 independent differentiations. \*\*\*\*p<0.0001, \*\*p<0.005 ns = not  
738 significant, 2-way ANOVA with Sidak's multiple comparisons.

739

740

741

742

743

744

745

746

747

748

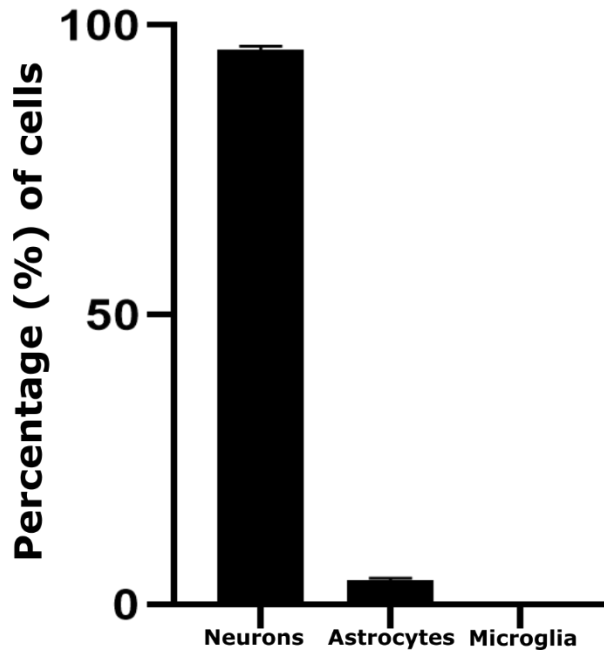

749

750 **Fig S1. *In vitro* neuronal cultures are pure with little glial contamination**

751 Quantification of the *in vitro* cultures after 12 DIV stained with anti-Tuj1 antibodies,  
752 (neuronal marker), an anti-astrocyte cocktail (anti-GFAP, anti-S100B, anti-ALDH1L1),  
753 and Iba1 (microglia marker). The numbers are presented as percentage of total cells  
754 counted (n= 100/experiment). Bars, mean  $\pm$  SEM, N= 3 experiments.

755

756

757

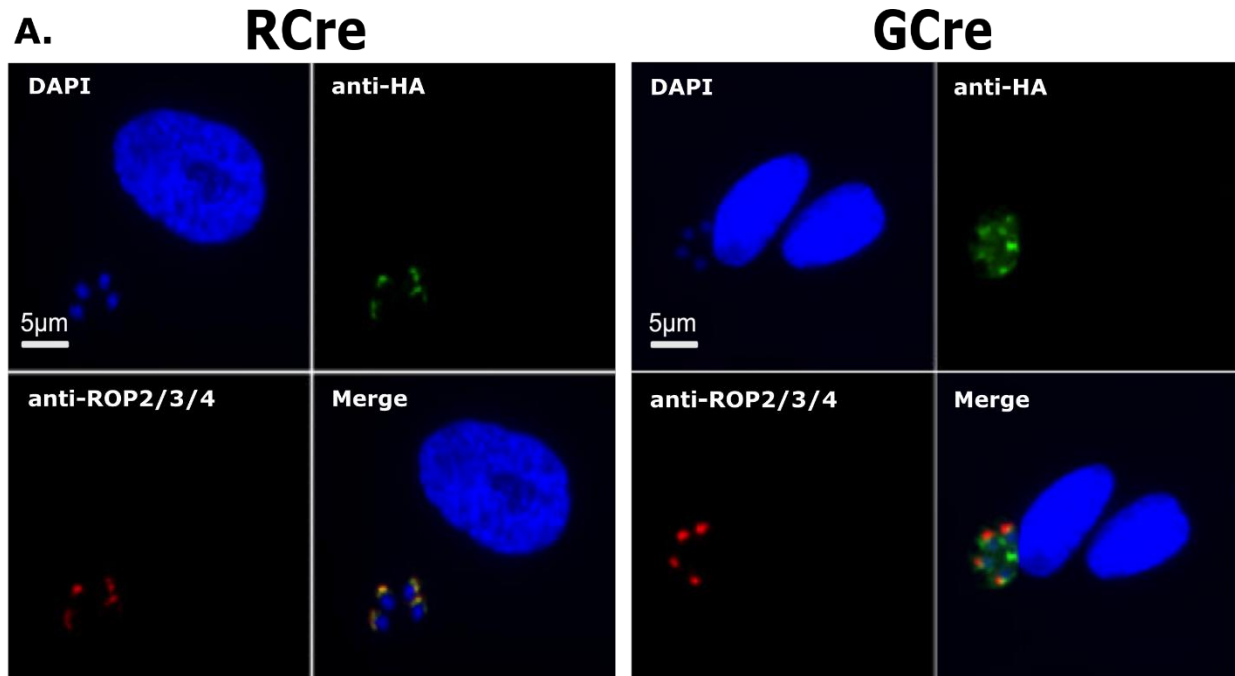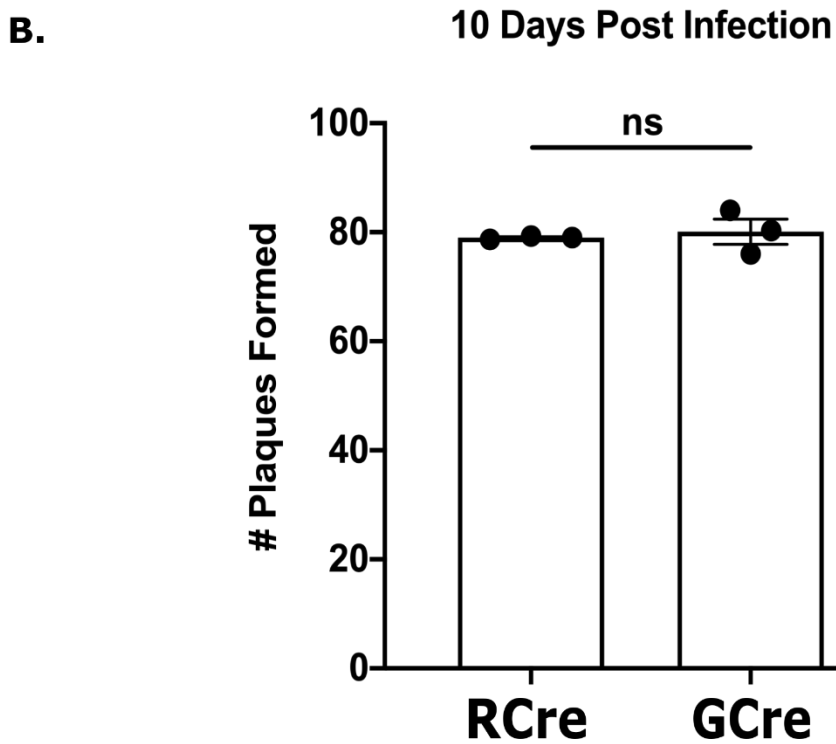

758

759 **Fig S2. GCre is expressed and viable in *T. gondii*.**



760 **A.** Immunofluorescence for HA-tagged RCre and GCre fusion protein. HFFs were  
761 infected with identified strains (MOI=1) for 24 hours. Images depict listed *T. gondii*-Cre  
762 strain stained with anti-HA (green), anti-ROP2/3/4 (red), and DAPI (blue).

763 **B.** Quantification of plaque assay at 10 dpi after infection with 200 parasites of the  
764 identified strains. Each dot = 1 experiment, N = 3 experiments. Bars,  $\pm$  mean SEM.  
765 Welch's t test. ns = not significant.

766

**A**

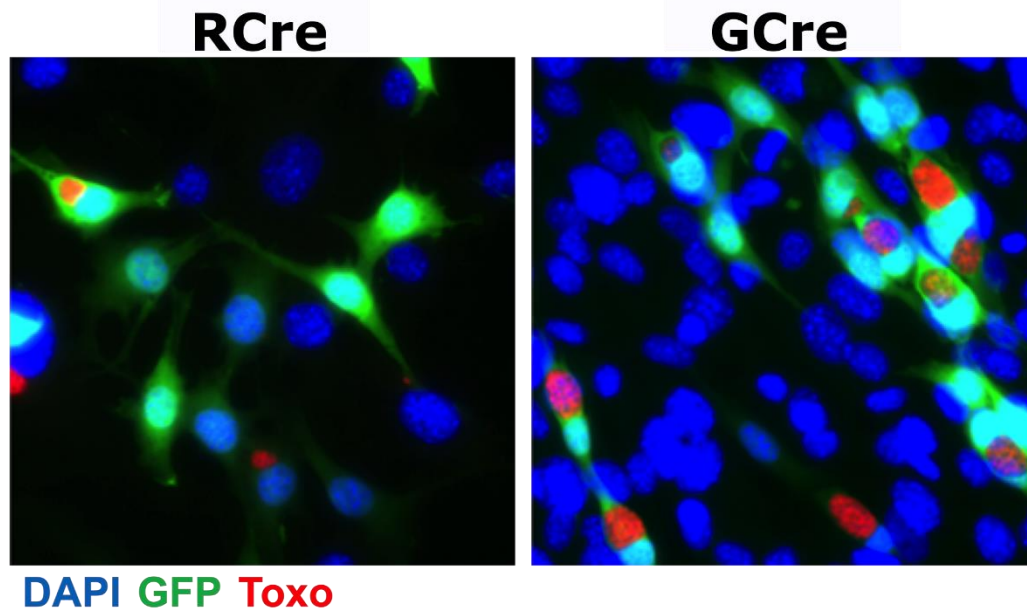

**B**

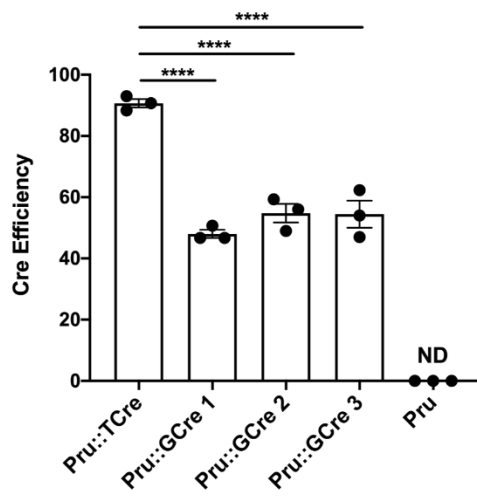

**C**

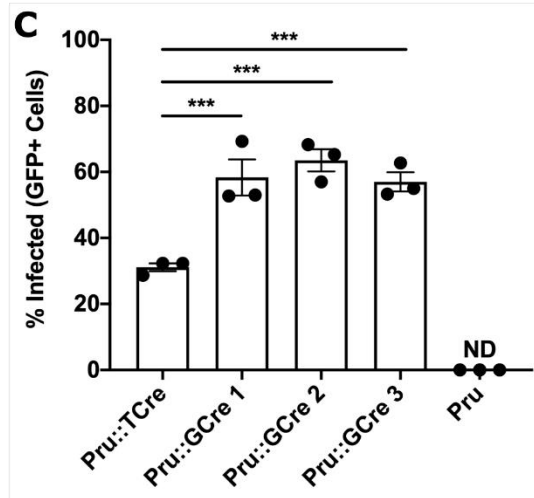

**D**

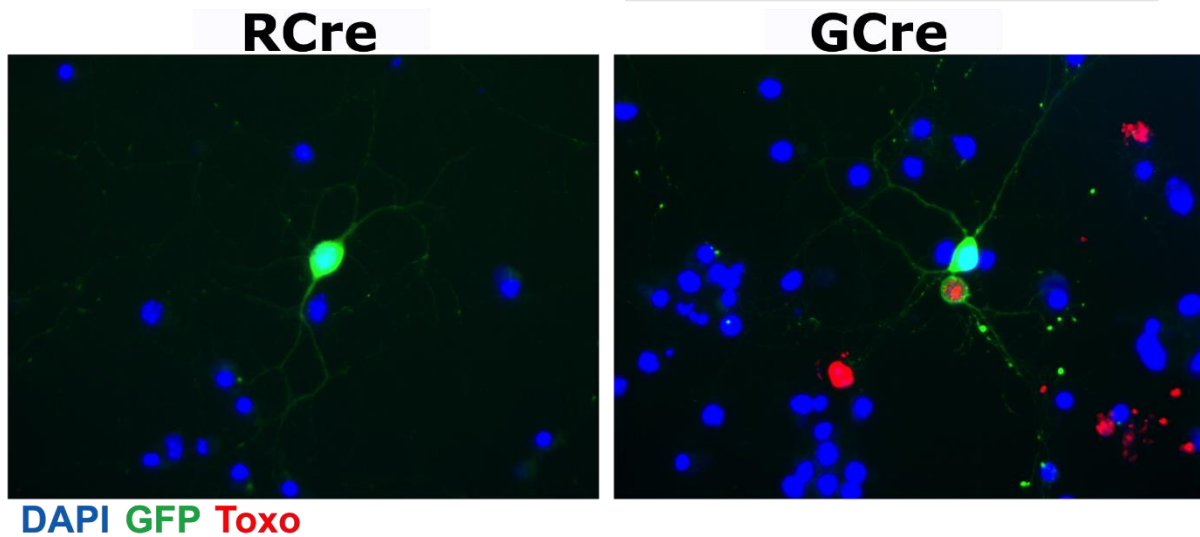

768 **Fig S3. GCre is capable of Cre-mediated recombination in Cre-reporter fibroblasts**  
769 **and Cre-reporter neurons.**

770 **A.** Immunofluorescence for Cre-mediated recombination in Cre reporter fibroblasts  
771 infected with either RCre or GCre parasites. Cre reporter fibroblasts were infected with  
772 identified strains (MOI 1) for 24 hours and then fixed and stained. Images depict GFP  
773 (green), parasites (anti-SAG1; red), and nuclei (DAPI, blue).

774 **B.** Quantification of Cre-mediated recombination efficiency. Cre reporter fibroblasts  
775 were infected as in **(A)** and efficiency scores were quantified by dividing the number of  
776 GFP<sup>+</sup> cells by the number of infected cells multiplied by 100.

777 **C.** The percentage of GFP<sup>+</sup> cells that actively harbored a parasite was quantified by  
778 dividing the number of infected GFP<sup>+</sup> cells by the total number of GFP<sup>+</sup> cells multiplied  
779 by 100.

780 **D.** Immunofluorescence for Cre-mediated recombination in Cre reporter neurons  
781 infected with either RCre or GCre parasites. Cre reporter neurons were infected with  
782 identified strains (MOI=0.1) for 72 hours and then fixed and stained. Images depict  
783 GFP<sup>+</sup> neurons (green), parasites (anti-SRS9 and anti-SAG1; red), and nuclei (DAPI,  
784 blue).

785 **B** and **C** Values, mean ± SEM. Each dot represents the mean value of 1 experiment. N  
786 = 3 experiments. One-way ANOVA with Dunnett's multiple comparison test.

787 \*\*\*p<0.0005 and \*\*\*\*p<0.0001. ND = Not Detected.

788

789

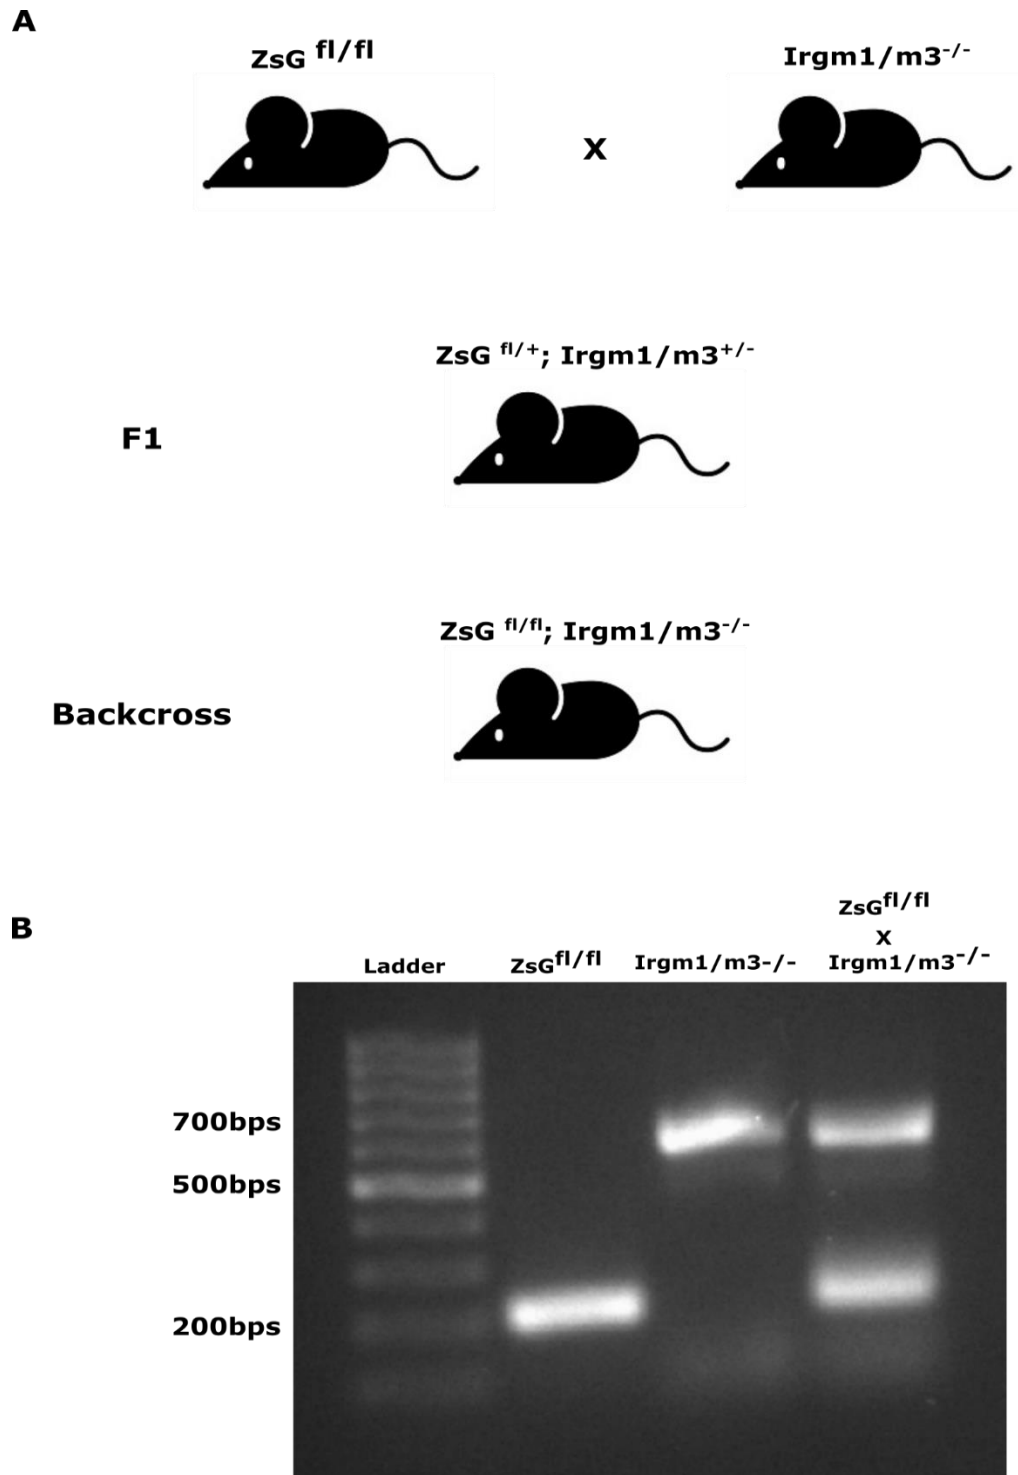

790

791 **Fig S4. Generation of Cre reporter Irgm1/m3 knockout mice**

792 **A.** Schematic representation of breeding Cre reporter to Irgm1/m3 knockout mice.

793 **B.** Agarose gel representing the genotyping of the transgenic lines.

794

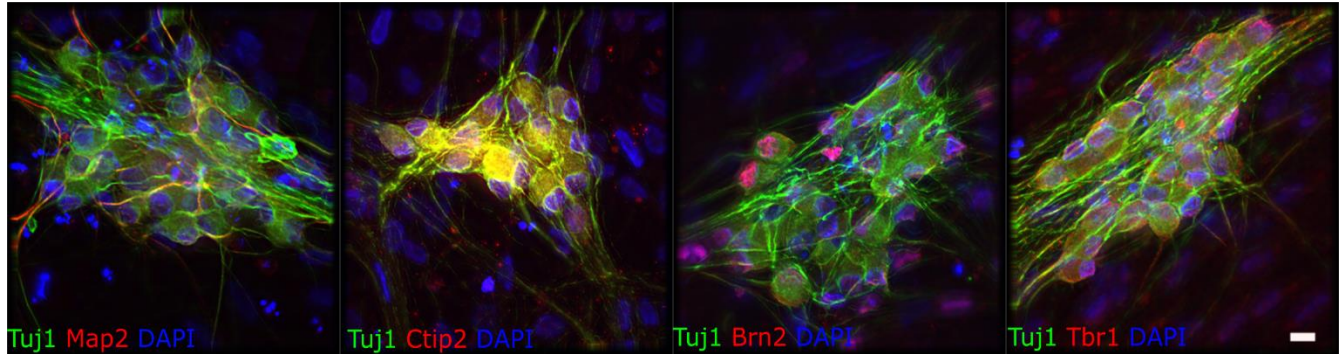

795

796 **Fig S5. Characterization of human neurons for cortical layer markers**

797 Human stem cell derived neurons were grown and differentiated for 14 days, after which  
798 cultures were fixed and stained with DAPI and anti-Tuj1 antibodies (pan neuronal  
799 marker) and one of the following: anti-Map2 antibodies (mature neuronal marker), anti-  
800 Ctip2 antibodies (cortical layer V, VI), anti-Brn2 antibodies (cortical layer II-V), or anti-  
801 Tbr1 antibodies (cortical layer I, V, VI). Scale bar = 25 $\mu$ m

802

803

804

805

806

807

808

809

810

811

812

## 813 References

- 814 1. Andrade, R.M., Wessendarp, M., Gubbels, M.-J., Striepen, B., and Subauste,  
815 C.S. (2006). CD40 induces macrophage anti-Toxoplasma gondii activity by  
816 triggering autophagy-dependent fusion of pathogen-containing vacuoles and  
817 lysosomes. *J Clin Invest* 116, 2366–2377.
- 818 2. Berenreiterová, M., Flegr, J., Kuběna, A.A., and Němec, P. (2011). The  
819 Distribution of Toxoplasma gondii Cysts in the Brain of a Mouse with Latent  
820 Toxoplasmosis: Implications for the Behavioral Manipulation Hypothesis. *PLOS*  
821 *ONE* 6, e28925.
- 822 3. Binder, G.K., and Griffin, D.E. (2001). Interferon- $\gamma$ -Mediated Site-Specific  
823 Clearance of Alphavirus from CNS Neurons. *Science* 293, 303–306.
- 824 4. Blanchard, N., Gonzalez, F., Schaeffer, M., Joncker, N.T., Cheng, T., Shastri,  
825 A.J., Robey, E.A., and Shastri, N. (2008). Immunodominant, protective response  
826 to the parasite Toxoplasma gondii requires antigen processing in the  
827 endoplasmic reticulum. *Nat Immunol* 9, 937–944.
- 828 5. Boehm, U., Guethlein, L., Klamp, T., Ozbek, K., Schaub, A., Fütterer, A., Pfeffer,  
829 K., and Howard, J.C. (1998). Two Families of GTPases Dominate the Complex  
830 Cellular Response to IFN- $\gamma$ . *The Journal of Immunology* 161, 6715–6723.
- 831 6. Boillat, M., Hammoudi, P.-M., Dogga, S.K., Pagès, S., Goubran, M., Rodriguez,  
832 I., and Soldati-Favre, D. (2020). Neuroinflammation-Associated Aspecific  
833 Manipulation of Mouse Predator Fear by Toxoplasma gondii. *Cell Reports* 30,  
834 320-334.e6.
- 835 7. Bougdour, A., Durandau, E., Brenier-Pinchart, M.-P., Ortet, P., Barakat, M.,  
836 Kieffer, S., Curt-Varesano, A., Curt-Bertini, R.-L., Bastien, O., Coute, Y., et al.  
837 (2013). Host Cell Subversion by Toxoplasma GRA16, an Exported Dense  
838 Granule Protein that Targets the Host Cell Nucleus and Alters Gene Expression.  
839 *Cell Host & Microbe* 13, 489–500.
- 840 8. Bracha, S., Hassi, K., Ross, P.D., Cobb, S., Sheiner, L., and Rechavi, O. (2018).  
841 Engineering Brain Parasites for Intracellular Delivery of Therapeutic Proteins.  
842 *BioRxiv* 481192.
- 843 9. Braun, L., Brenier-Pinchart, M.-P., Yogavel, M., Curt-Varesano, A., Curt-Bertini,  
844 R.-L., Hussain, T., Kieffer-Jaquinod, S., Coute, Y., Pelloux, H., Tardieux, I., et al.  
845 (2013). A Toxoplasma dense granule protein, GRA24, modulates the early  
846 immune response to infection by promoting a direct and sustained host p38  
847 MAPK activation. *Journal of Experimental Medicine* 210, 2071–2086.
- 848 10. Brown, C.R., Hunter, C.A., Estes, R.G., Beckmann, E., Forman, J., David, C.,  
849 Remington, J.S., and McLeod, R. (1995). Definitive identification of a gene that  
850 confers resistance against Toxoplasma cyst burden and encephalitis.  
851 *Immunology* 85, 419–428.
- 852 11. Cabral, C.M., Tuladhar, S., Dietrich, H.K., Nguyen, E., MacDonald, W.R., Trivedi,  
853 T., Devineni, A., and Koshy, A.A. (2016). Neurons are the Primary Target Cell for  
854 the Brain-Tropic Intracellular Parasite Toxoplasma gondii. *PLoS Pathog.* 12,  
855 e1005447.
- 856 12. Cabral, C.M., McGovern, K.E., MacDonald, W.R., Franco, J., and Koshy, A.A.  
857 (2017). Dissecting Amyloid Beta Deposition Using Distinct Strains of the

- 858 Neurotropic Parasite *Toxoplasma gondii* as a Novel Tool. *ASN Neuro* 9,  
859 1759091417724915.
- 860 13. Cabral, C.M., Merritt, E.F., and Koshy, A.A. (2020). Three-Dimensional  
861 Reconstruction of *Toxoplasma*-Neuron Interactions In Situ. *Methods Mol Biol*  
862 *2071*, 283–295.
- 863 14. Collazo, C.M., Yap, G.S., Sempowski, G.D., Lusby, K.C., Tessarollo, L., Woude,  
864 G.F.V., Sher, A., and Taylor, G.A. (2001). Inactivation of *Lrg-47* and *Irg-47*  
865 Reveals a Family of Interferon  $\gamma$ -Inducible Genes with Essential, Pathogen-  
866 Specific Roles in Resistance to Infection. *J Exp Med* *194*, 181–188.
- 867 15. Collazo, C.M., Yap, G.S., Hieny, S., Caspar, P., Feng, C.G., Taylor, G.A., and  
868 Sher, A. (2002). The function of gamma interferon-inducible GTP-binding protein  
869 IGTP in host resistance to *Toxoplasma gondii* is Stat1 dependent and requires  
870 expression in both hematopoietic and nonhematopoietic cellular compartments.  
871 *Infect Immun* *70*, 6933–6939.
- 872 16. Curt-Varesano, A., Braun, L., Ranquet, C., Hakimi, M.-A., and Bougdour, A.  
873 (2016). The aspartyl protease TgASP5 mediates the export of the *Toxoplasma*  
874 GRA16 and GRA24 effectors into host cells. *Cellular Microbiology* *18*, 151–167.
- 875 17. Degrandi, D., Kravets, E., Konermann, C., Beuter-Gunia, C., Klümpers, V.,  
876 Lahme, S., Rasch, E., Mausberg, A.K., Beer-Hammer, S., and Pfeffer, K. (2013).  
877 Murine Guanylate Binding Protein 2 (mGBP2) controls *Toxoplasma gondii*  
878 replication. *PNAS* *110*, 294–299.
- 879 18. Delhayes, S., Paul, S., Blakqori, G., Minet, M., Weber, F., Staeheli, P., and  
880 Michiels, T. (2006). Neurons produce type I interferon during viral encephalitis.  
881 *PNAS* *103*, 7835–7840.
- 882 19. Detje, C.N., Meyer, T., Schmidt, H., Kreuz, D., Rose, J.K., Bechmann, I., Prinz,  
883 M., and Kalinke, U. (2009). Local type I IFN receptor signaling protects against  
884 virus spread within the central nervous system. *J Immunol* *182*, 2297–2304.
- 885 20. Donald, R.G.K., Carter, D., Ullman, B., and Roos, D.S. (1996). Insertional  
886 Tagging, Cloning, and Expression of the Hypoxanthine-Xanthine-Guanine  
887 Phosphoribosyltransferase Gene. *Journal of Biological Chemistry* *271*, 14010–  
888 14019.
- 889 21. Ferguson, D.J., and Hutchison, W.M. (1987a). The host-parasite relationship of  
890 *Toxoplasma gondii* in the brains of chronically infected mice. *Virchows Arch A*  
891 *Pathol Anat Histopathol* *411*, 39–43.
- 892 22. Ferguson, D.J.P., and Hutchison, W.M. (1987b). An ultrastructural study of the  
893 early development and tissue cyst formation of *Toxoplasma gondii* in the brains  
894 of mice. *Parasitol Res* *73*, 483–491.
- 895 23. Fisch, D., Clough, B., and Frickel, E.-M. (2019). Human immunity to *Toxoplasma*  
896 *gondii*. *PLOS Pathogens* *15*, e1008097.
- 897
- 898 24. Franco, M., Panas, M.W., Marino, N.D., Lee, M.-C.W., Buchholz, K.R., Kelly,  
899 F.D., Bednarski, J.J., Sleckman, B.P., Pourmand, N., and Boothroyd, J.C. (2016).  
900 A Novel Secreted Protein, MYR1, Is Central to *Toxoplasma*'s Manipulation of  
901 Host Cells. *MBio* *7*, e02231-02215.

- 902 25. Gay, G., Braun, L., Brenier-Pinchart, M.-P., Voltaire, J., Josserand, V., Bertini, R.-  
903 L., Varesano, A., Touquet, B., De Bock, P.-J., Coute, Y., et al. (2016).  
904 *Toxoplasma gondii* TgIST co-opts host chromatin repressors dampening STAT1-  
905 dependent gene regulation and IFN- $\gamma$ -mediated host defenses. *Journal of*  
906 *Experimental Medicine* 213, 1779–1798.
- 907 26. Halonen, S.K., Chiu, F., and Weiss, L.M. (1998). Effect of cytokines on growth of  
908 *Toxoplasma gondii* in murine astrocytes. *Infect. Immun.* 66, 4989–4993.
- 909 27. Halonen, S.K., Taylor, G.A., and Weiss, L.M. (2001). Gamma Interferon-Induced  
910 Inhibition of *Toxoplasma gondii* in Astrocytes Is Mediated by IGTP. *Infection and*  
911 *Immunity* 69, 5573–5576.
- 912 28. Henry, S.C., Daniell, X.G., Burroughs, A.R., Indaram, M., Howell, D.N., Coers, J.,  
913 Starnbach, M.N., Hunn, J.P., Howard, J.C., Feng, C.G., et al. (2009). Balance of  
914 Irgm protein activities determines IFN- $\gamma$ -induced host defense. *Journal of*  
915 *Leukocyte Biology* 85, 877–885.
- 916 29. Hermanns, T., Müller, U.B., Könen-Waisman, S., Howard, J.C., and Steinfeldt, T.  
917 (2016). The *Toxoplasma gondii* rho-trypanin ROP18 is an Irga6-specific kinase  
918 and regulated by the dense granule protein GRA7. *Cellular Microbiology* 18,  
919 244–259.
- 920 30. Howard, J.C., Hunn, J.P., and Steinfeldt, T. (2011). The IRG protein-based  
921 resistance mechanism in mice and its relation to virulence in *Toxoplasma gondii*.  
922 *Curr. Opin. Microbiol.* 14, 414–421.
- 923 31. Hunn, J.P., Könen-Waisman, S., Papic, N., Schroeder, N., Pawlowski, N.,  
924 Lange, R., Kaiser, F., Zerrahn, J., Martens, S., and Howard, J.C. (2008).  
925 Regulatory interactions between IRG resistance GTPases in the cellular  
926 response to *Toxoplasma gondii*. *EMBO J* 27, 2495–2509.
- 927 32. Joly, E., Mucke, L., and Oldstone, M.B.A. (1991). Viral persistence in neurons  
928 explained by lack of major histocompatibility class I expression. *Science* 253,  
929 1283–1286.
- 930 33. Jones, T.C., Bienz, K.A., and Erb, P. (1986). In vitro cultivation of *Toxoplasma*  
931 *gondii* cysts in astrocytes in the presence of gamma interferon. *Infect Immun* 51,  
932 147–156.
- 933 34. Khaminets, A., Hunn, J.P., Könen-Waisman, S., Zhao, Y.O., Preukschat, D.,  
934 Coers, J., Boyle, J.P., Ong, Y.-C., Boothroyd, J.C., Reichmann, G., et al. (2010).  
935 Coordinated loading of IRG resistance GTPases on to the *Toxoplasma gondii*  
936 parasitophorous vacuole. *Cell. Microbiol.* 12, 939–961.
- 937 35. Koshy, A.A., and Cabral, C.M. (2014). 3-D imaging and analysis of neurons  
938 infected in vivo with *Toxoplasma gondii*. *J Vis Exp.*
- 939 36. Koshy, A.A., Fouts, A.E., Lodoen, M.B., Alkan, O., Blau, H.M., and Boothroyd,  
940 J.C. (2010). *Toxoplasma* secreting Cre recombinase for analysis of host-parasite  
941 interactions. *Nat Methods* 7, 307–309.
- 942 37. Koshy, A.A., Dietrich, H.K., Christian, D.A., Melehani, J.H., Shastri, A.J., Hunter,  
943 C.A., and Boothroyd, J.C. (2012). *Toxoplasma* co-opts host cells it does not  
944 invade. *PLoS Pathog.* 8, e1002825.
- 945 38. Lafuse, W.P., Brown, D., Castle, L., and Zwilling, B.S. (1995). Cloning and  
946 characterization of a novel cDNA that is IFN- $\gamma$ -induced in mouse peritoneal



- 947           macrophages and encodes a putative GTP-binding protein. *J Leukoc Biol* 57,  
948           477–483.
- 949       39. Livak, K.J., and Schmittgen, T.D. (2001). Analysis of Relative Gene Expression  
950       Data Using Real-Time Quantitative PCR and the  $2^{-\Delta\Delta CT}$  Method. *Methods* 25,  
951       402–408.
- 952       40. MacMicking, J.D. (2012). Interferon-inducible effector mechanisms in cell-  
953       autonomous immunity. *Nature Reviews Immunology* 12, 367–382.
- 954       41. Madisen, L., Zwingman, T.A., Sunkin, S.M., Oh, S.W., Zariwala, H.A., Gu, H., Ng,  
955       L.L., Palmiter, R.D., Hawrylycz, M.J., Jones, A.R., et al. (2010). A robust and  
956       high-throughput Cre reporting and characterization system for the whole mouse  
957       brain. *Nat. Neurosci.* 13, 133–140.
- 958       42. Martens, S., Parvanova, I., Zerrahn, J., Griffiths, G., Schell, G., Reichmann, G.,  
959       and Howard, J.C. (2005). Disruption of *Toxoplasma gondii* Parasitophorous  
960       Vacuoles by the Mouse p47-Resistance GTPases. *PLOS Pathogens* 1, e24.
- 961       43. Melzer, T.C., Cranston, H.J., Weiss, L.M., and Halonen, S.K. (2010). Host Cell  
962       Preference of *Toxoplasma gondii* Cysts in Murine Brain: A Confocal Study. *J*  
963       *Neuroparasitology* 1.
- 964       44. Mendez, O.A., Potter, C.J., Valdez, M., Bello, T., Trouard, T.P., and Koshy, A.A.  
965       (2018). Semi-automated quantification and neuroanatomical mapping of  
966       heterogeneous cell populations. *Journal of Neuroscience Methods* 305, 98–104.
- 967       45. Neumann, H., Cavalié, A., Jenne, D.E., and Wekerle, H. (1995). Induction of  
968       MHC class I genes in neurons. *Science* 269, 549–552.
- 969       46. Neumann, H., Schmidt, H., Cavalié, A., Jenne, D., and Wekerle, H. (1997). Major  
970       Histocompatibility Complex (MHC) Class I Gene Expression in Single Neurons of  
971       the Central Nervous System: Differential Regulation by Interferon (IFN)- $\gamma$  and  
972       Tumor Necrosis Factor (TNF)- $\alpha$ . *Journal of Experimental Medicine* 185, 305–316.
- 973       47. O'Donnell, L.A., Henkins, K.M., Kulkarni, A., Matullo, C.M., Balachandran, S.,  
974       Pattisapu, A.K., and Rall, G.F. (2015). Interferon gamma induces protective non-  
975       canonical signaling pathways in primary neurons. *J. Neurochem.* 135, 309–322.
- 976       48. Oldstone, M.B., Blount, P., Southern, P.J., and Lampert, P.W. (1986).  
977       Cytoimmunotherapy for persistent virus infection reveals a unique clearance  
978       pattern from the central nervous system. *Nature* 321, 239–243.
- 979       49. Orvedahl, A., MacPherson, S., Sumpter, R., Tallóczy, Z., Zou, Z., and Levine, B.  
980       (2010). Autophagy protects against Sindbis virus infection of the central nervous  
981       system. *Cell Host Microbe* 7, 115–127.
- 982       50. Parker, S.S., Moutal, A., Cai, S., Chandrasekaran, S., Roman, M.R., Koshy, A.A.,  
983       Khanna, R., Zinsmaier, K.E., and Mouneimne, G. (2018). High Fidelity  
984       Cryopreservation and Recovery of Primary Rodent Cortical Neurons. *ENeuro* 5.
- 985       51. Rall, G.F., Mucke, L., and Oldstone, M.B. (1995). Consequences of cytotoxic T  
986       lymphocyte interaction with major histocompatibility complex class I-expressing  
987       neurons in vivo. *Journal of Experimental Medicine* 182, 1201–1212.
- 988       52. Rose, R.W., Vorobyeva, A.G., Skipworth, J.D., Nicolas, E., and Rall, G.F. (2007).  
989       Altered levels of STAT1 and STAT3 influence the neuronal response to interferon  
990       gamma. *Journal of Neuroimmunology* 192, 145–156.

- 991 53. Saeij, J.P.J., Boyle, J.P., Collier, S., Taylor, S., Sibley, L.D., Brooke-Powell, E.T.,  
992 Ajioka, J.W., and Boothroyd, J.C. (2006). Polymorphic Secreted Kinases Are Key  
993 Virulence Factors in Toxoplasmosis. *Science* 314, 1780–1783.
- 994 54. Salvioni, A., Belloy, M., Lebourg, A., Bassot, E., Cantaloube-Ferrieu, V., Vasseur,  
995 V., Blanié, S., Liblau, R.S., Suberbielle, E., Robey, E.A., et al. (2019). Robust  
996 Control of a Brain-Persisting Parasite through MHC I Presentation by Infected  
997 Neurons. *Cell Rep* 27, 3254-3268.e8.
- 998 55. Schluter, D., Deckert, M., Hof, H., and Frei, K. (2001). *Toxoplasma gondii*  
999 infection of neurons induces neuronal cytokine and chemokine production, but  
1000 gamma interferon- and tumor necrosis factor-stimulated neurons fail to inhibit the  
1001 invasion and growth of *T. gondii*. *Infect Immun* 69, 7889–7893.
- 1002 56. Subauste, C.S. (2009). CD40, autophagy and *Toxoplasma gondii*. *Mem Inst*  
1003 *Oswaldo Cruz* 104, 267–272.
- 1004 57. Suzuki, Y., Orellana, M.A., Schreiber, R.D., and Remington, J.S. (1988).  
1005 Interferon-gamma: the major mediator of resistance against *Toxoplasma gondii*.  
1006 *Science* 240, 516–518.
- 1007 58. Suzuki, Y., Conley, F.K., and Remington, J.S. (1989). Importance of endogenous  
1008 IFN-gamma for prevention of toxoplasmic encephalitis in mice. *J Immunol* 143,  
1009 2045–2050.
- 1010 59. Taylor, G.A., Collazo, C.M., Yap, G.S., Nguyen, K., Gregorio, T.A., Taylor, L.S.,  
1011 Eagleson, B., Secrest, L., Southon, E.A., Reid, S.W., et al. (2000). Pathogen-  
1012 specific loss of host resistance in mice lacking the IFN-gamma-inducible gene  
1013 IGTP. *Proc Natl Acad Sci U S A* 97, 751–755.
- 1014 60. Taylor, S., Barragan, A., Su, C., Fux, B., Fentress, S.J., Tang, K., Beatty, W.L.,  
1015 Hajj, H.E., Jerome, M., Behnke, M.S., et al. (2006). A Secreted Serine-Threonine  
1016 Kinase Determines Virulence in the Eukaryotic Pathogen *Toxoplasma gondii*.  
1017 *Science* 314, 1776–1780.
- 1018 61. Wong, G.H.W., Bartlett, P.F., Clark-Lewis, I., Battye, F., and Schrader, J.W.  
1019 (1984). Inducible expression of H-2 and Ia antigens on brain cells. *Nature* 310,  
1020 688–691.
- 1021 62. Yan, Y., Shin, S., Jha, B.S., Liu, Q., Sheng, J., Li, F., Zhan, M., Davis, J., Bharti,  
1022 K., Zeng, X., et al. (2013). Efficient and rapid derivation of primitive neural stem  
1023 cells and generation of brain subtype neurons from human pluripotent stem cells.  
1024 *Stem Cells Transl Med* 2, 862–870.
- 1025 63. Zhao, Y.O., Khaminets, A., Hunn, J.P., and Howard, J.C. (2009). Disruption of  
1026 the *Toxoplasma gondii* parasitophorous vacuole by IFN-gamma-inducible  
1027 immunity-related GTPases (IRG proteins) triggers necrotic cell death. *PLoS*  
1028 *Pathog.* 5, e1000288.
